# Supplementary material for: New Insights into Evolution of the ABC Transporter Family in Mesostigma viride, a Unicellular Charophyte Algae
Source: MDPI journal article supplement (doi:10.3390/cimb44040112), 2022-04-11
Supplement: s1 [file s1]

**Supplementary Figure S1.** Expression profiles of ABC genes in *M. viride*. The genes IDs are on the right. The different environmental conditions used for expression analysis are indicated at the bottom of each column. Grey color indicates no expression.

**Supplementary Figure S2.** Phylogenetic analysis of ABCA subfamily proteins from 11 evolutionarily representative plant species. A Maximum Likelihood (ML) tree was generated using IQ-tree with 1000 bootstrap replicates, and bootstrap values >50% are shown on the branches. The *M. viride* proteins are highlighted by triangles.

**Supplementary Figure S3.** Phylogenetic analysis of ABCB subfamily proteins from 11 evolutionarily representative plant species. A Maximum Likelihood (ML) tree was generated using IQ-tree with 1000 bootstrap replicates, and bootstrap values >50% are shown on the branches. The *M. viride* proteins are highlighted by triangles.

**Supplementary Figure S4.** Phylogenetic analysis of ABCC subfamily proteins from 11 evolutionarily representative plant species. A Maximum Likelihood (ML) tree was generated using IQ-tree with 1000 bootstrap replicates, and bootstrap values >50% are shown on the branches. The *M. viride* proteins are highlighted by triangles.

**Supplementary Figure S5.** Phylogenetic analysis of ABCD subfamily proteins from 11 evolutionarily representative plant species. A Maximum Likelihood (ML) tree was generated using IQ-tree with 1000 bootstrap replicates, and bootstrap values >50% are shown on the branches. The *M. viride* proteins are highlighted by triangles.

**Supplementary Figure S6.** Phylogenetic analysis of ABCE subfamily proteins from 11 evolutionarily representative plant species. A Maximum Likelihood (ML) tree was generated using IQ-tree with 1000 bootstrap replicates, and bootstrap values >50% are shown on the branches. The *M. viride* proteins are highlighted by triangles.

**Supplementary Figure S7.** Phylogenetic analysis of ABCF subfamily proteins from 11 evolutionarily representative plant species. A Maximum Likelihood (ML) tree was generated using IQ-tree with 1000 bootstrap replicates, and bootstrap values >50% are shown on the branches. The *M. viride* proteins are highlighted by triangles.

**Supplementary Figure S8.** Phylogenetic analysis of ABCG subfamily proteins from 11 evolutionarily representative plant species. A Maximum Likelihood (ML) tree was generated using IQ-tree with 1000 bootstrap replicates, and bootstrap values >50% are shown on the branches. ABCGs include two major groups: the white-brown complex (WBC), and pleiotropic drug resistance proteins (PDRs). The *M. viride* proteins are highlighted by triangles.

**Supplementary Figure S9.** Phylogenetic analysis of ABCI subfamily proteins from 11 evolutionarily representative plant species. A Maximum Likelihood (ML) tree was generated using IQ-tree with 1000 bootstrap replicates, and bootstrap values >50% are shown on the branches. The *M. viride* proteins are highlighted by triangles.
