# Supplementary figures and images for: New Insights into Evolution of the ABC Transporter Family in Mesostigma viride, a Unicellular Charophyte Algae
Source: MDPI journal article supplement (doi:10.3390/cimb44040112), 2022-04-11

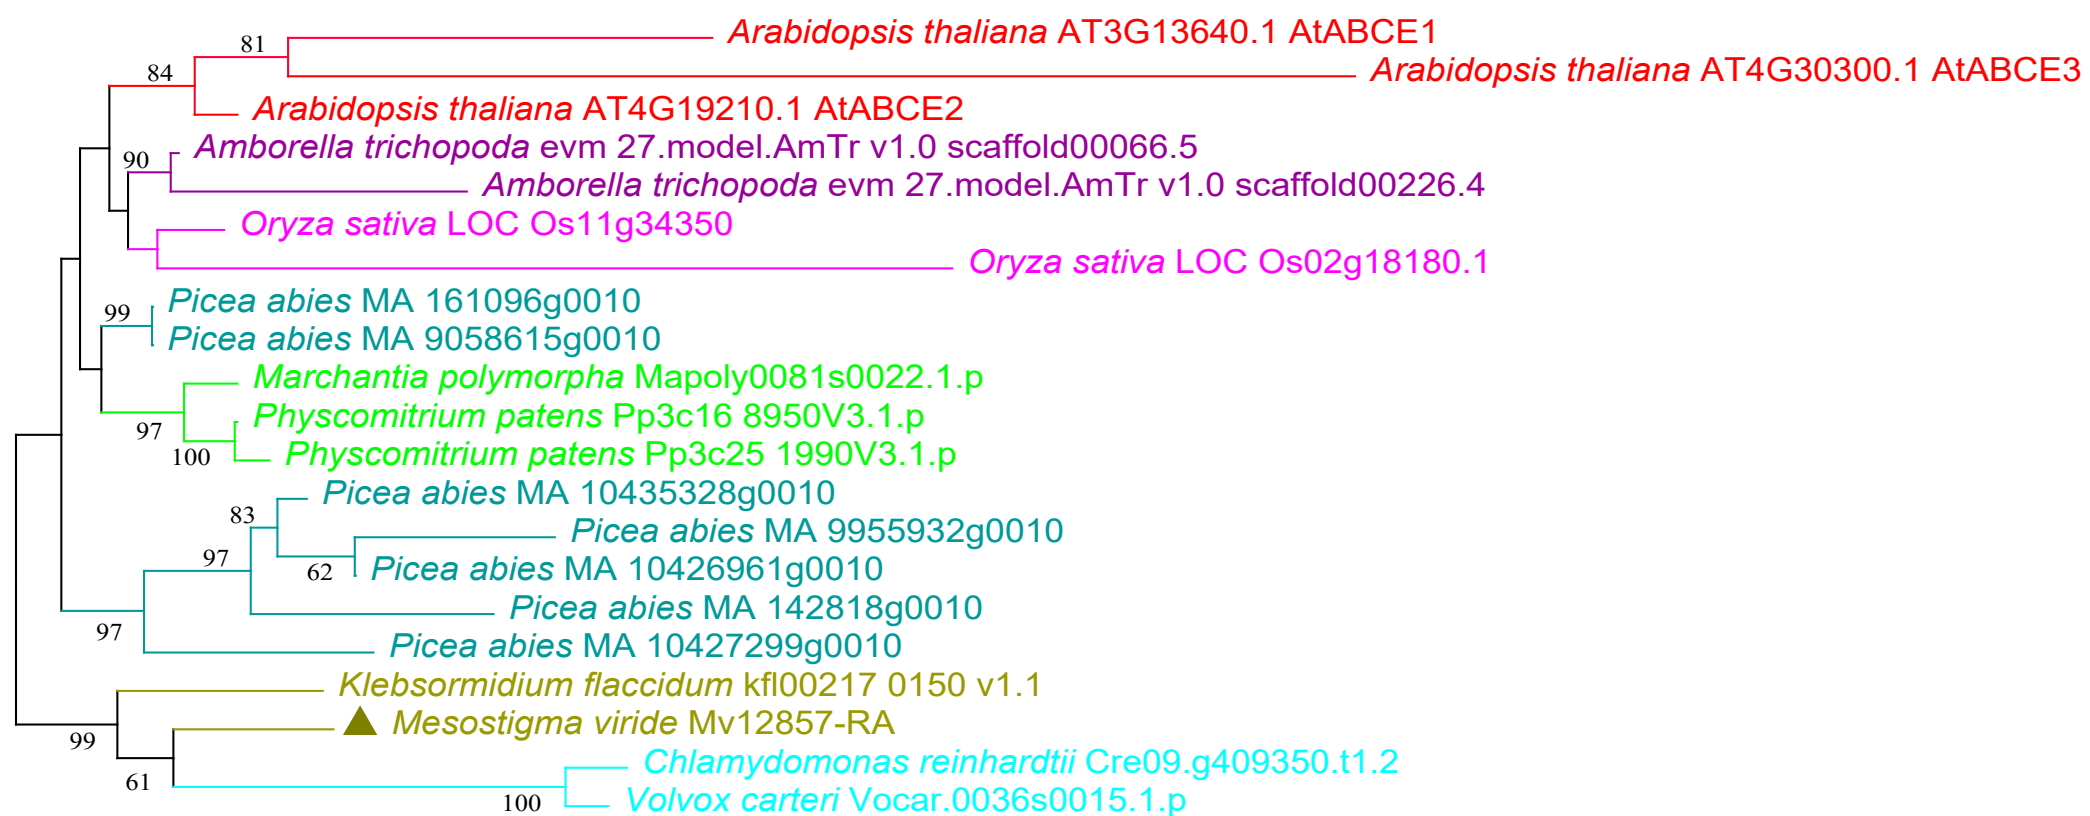

0.10

Supplement: s1 [file s1]

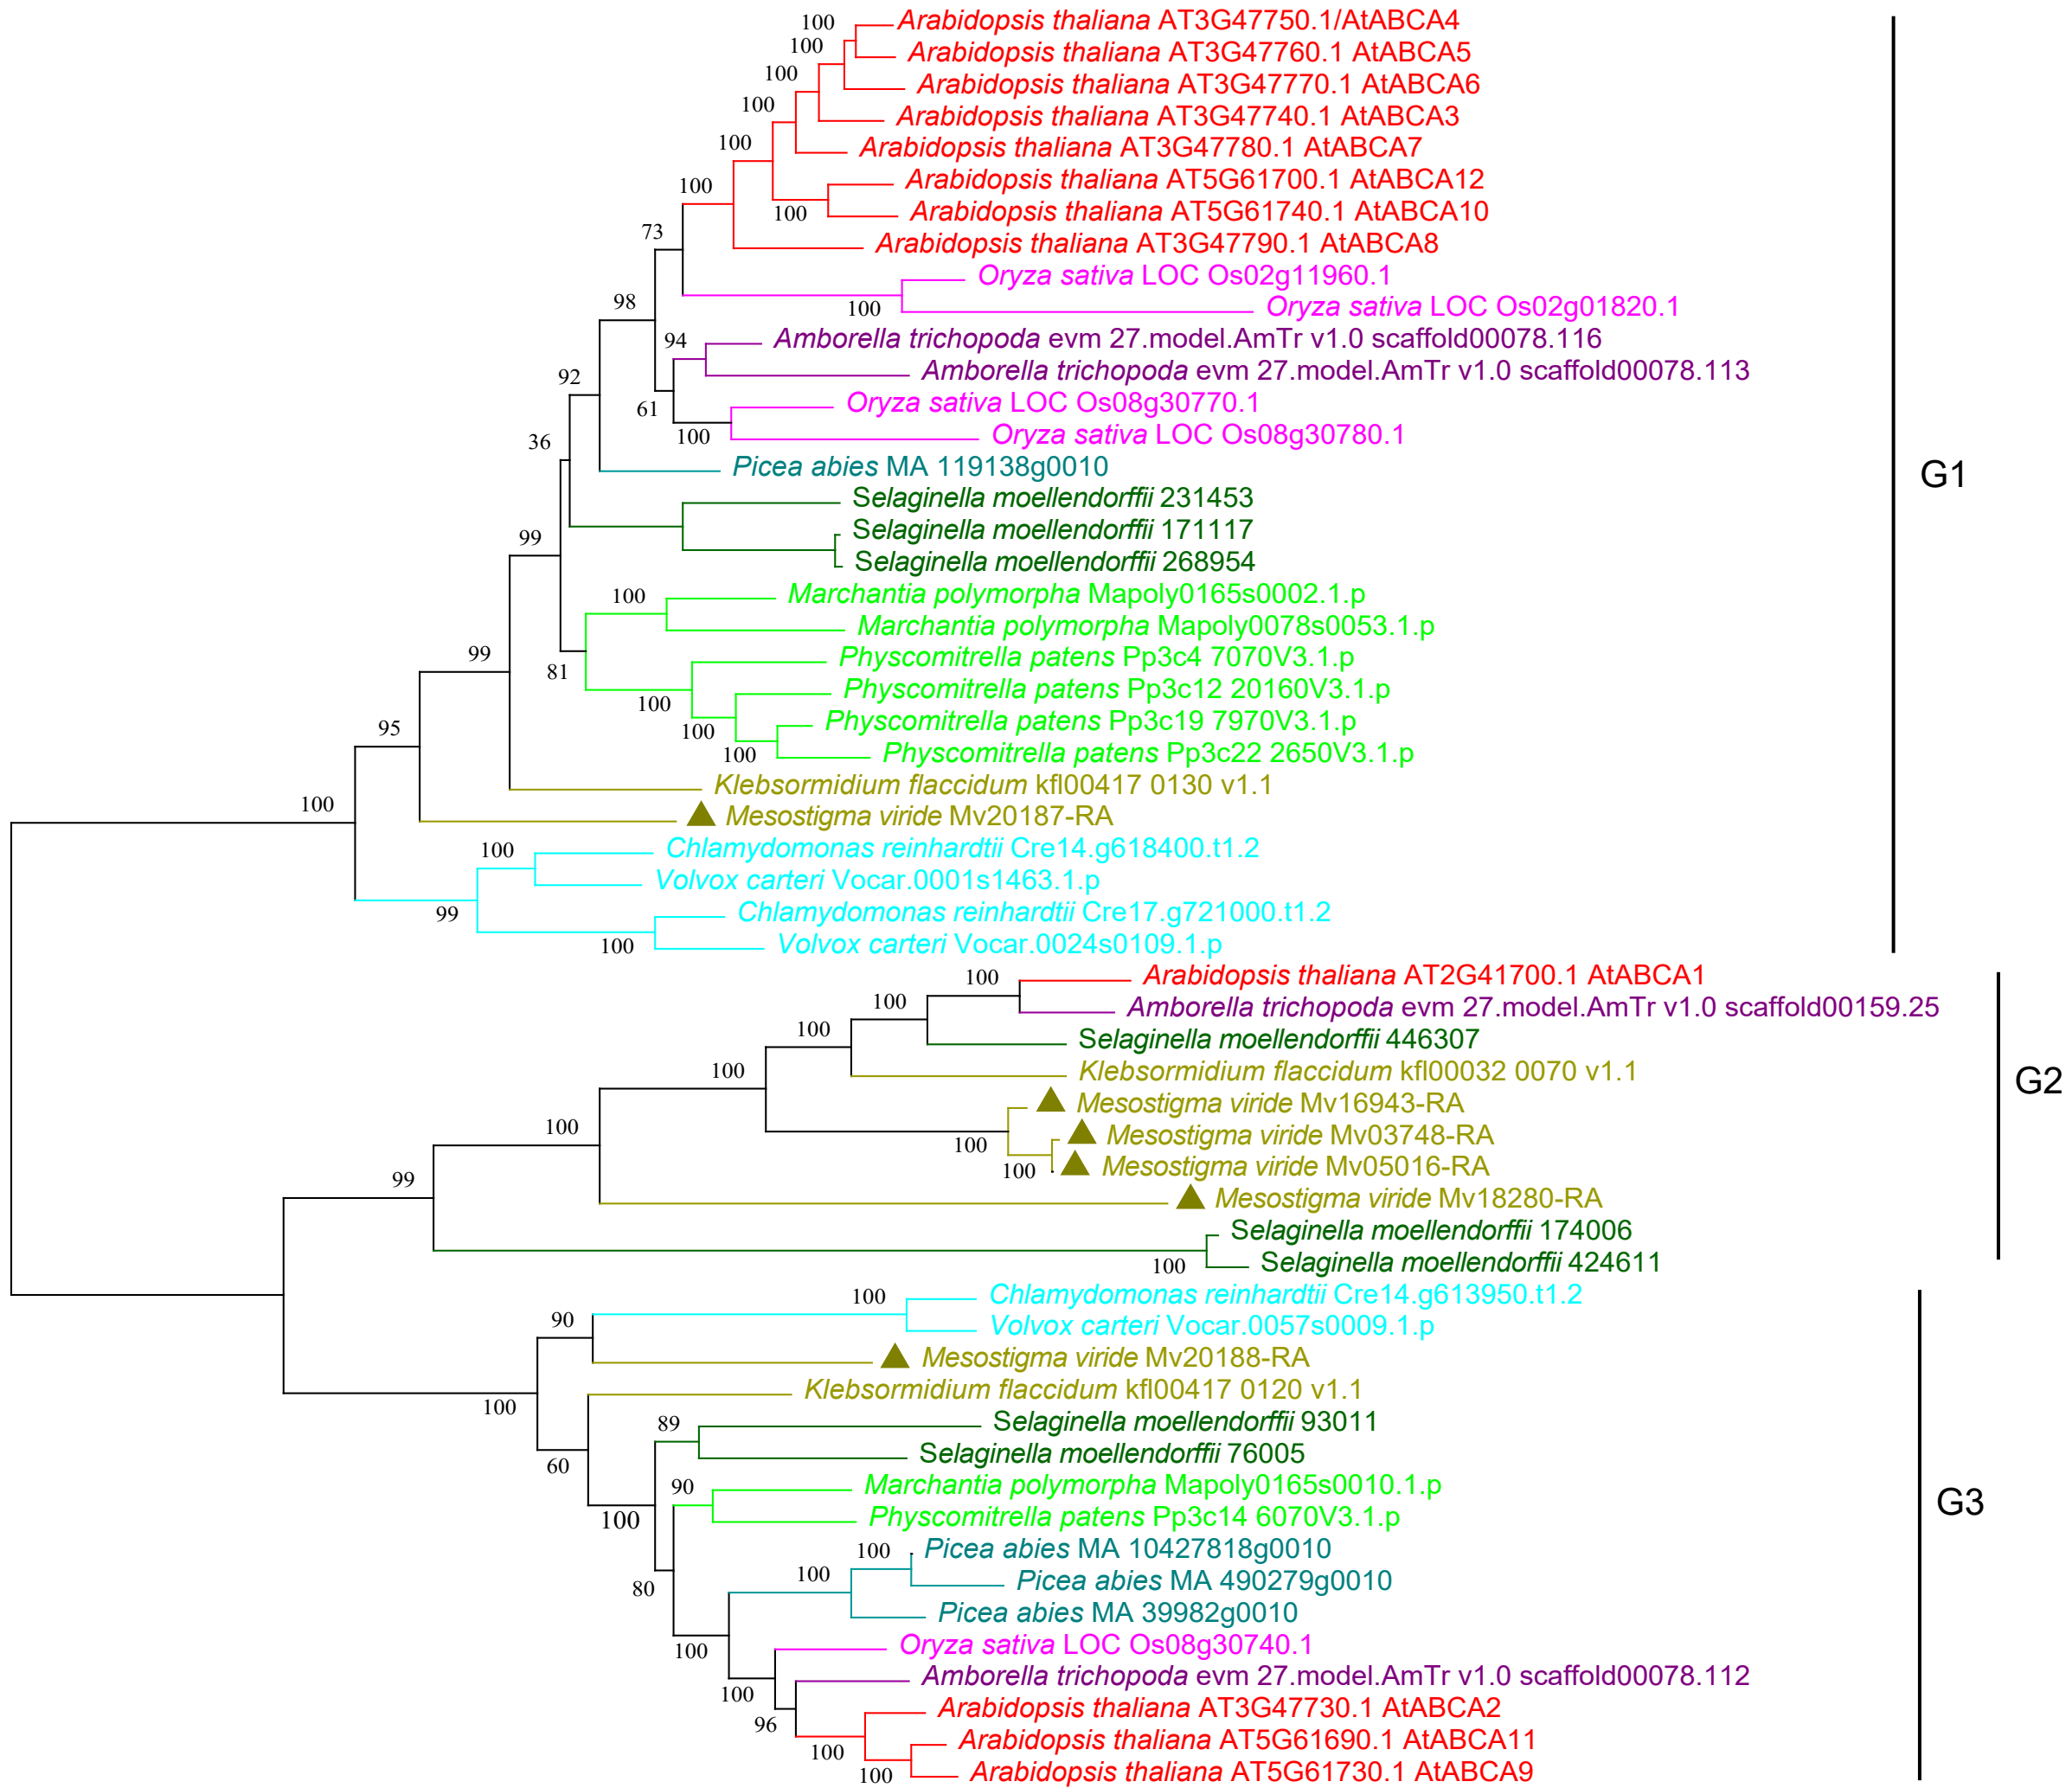

Supplement: s1 [file s1]

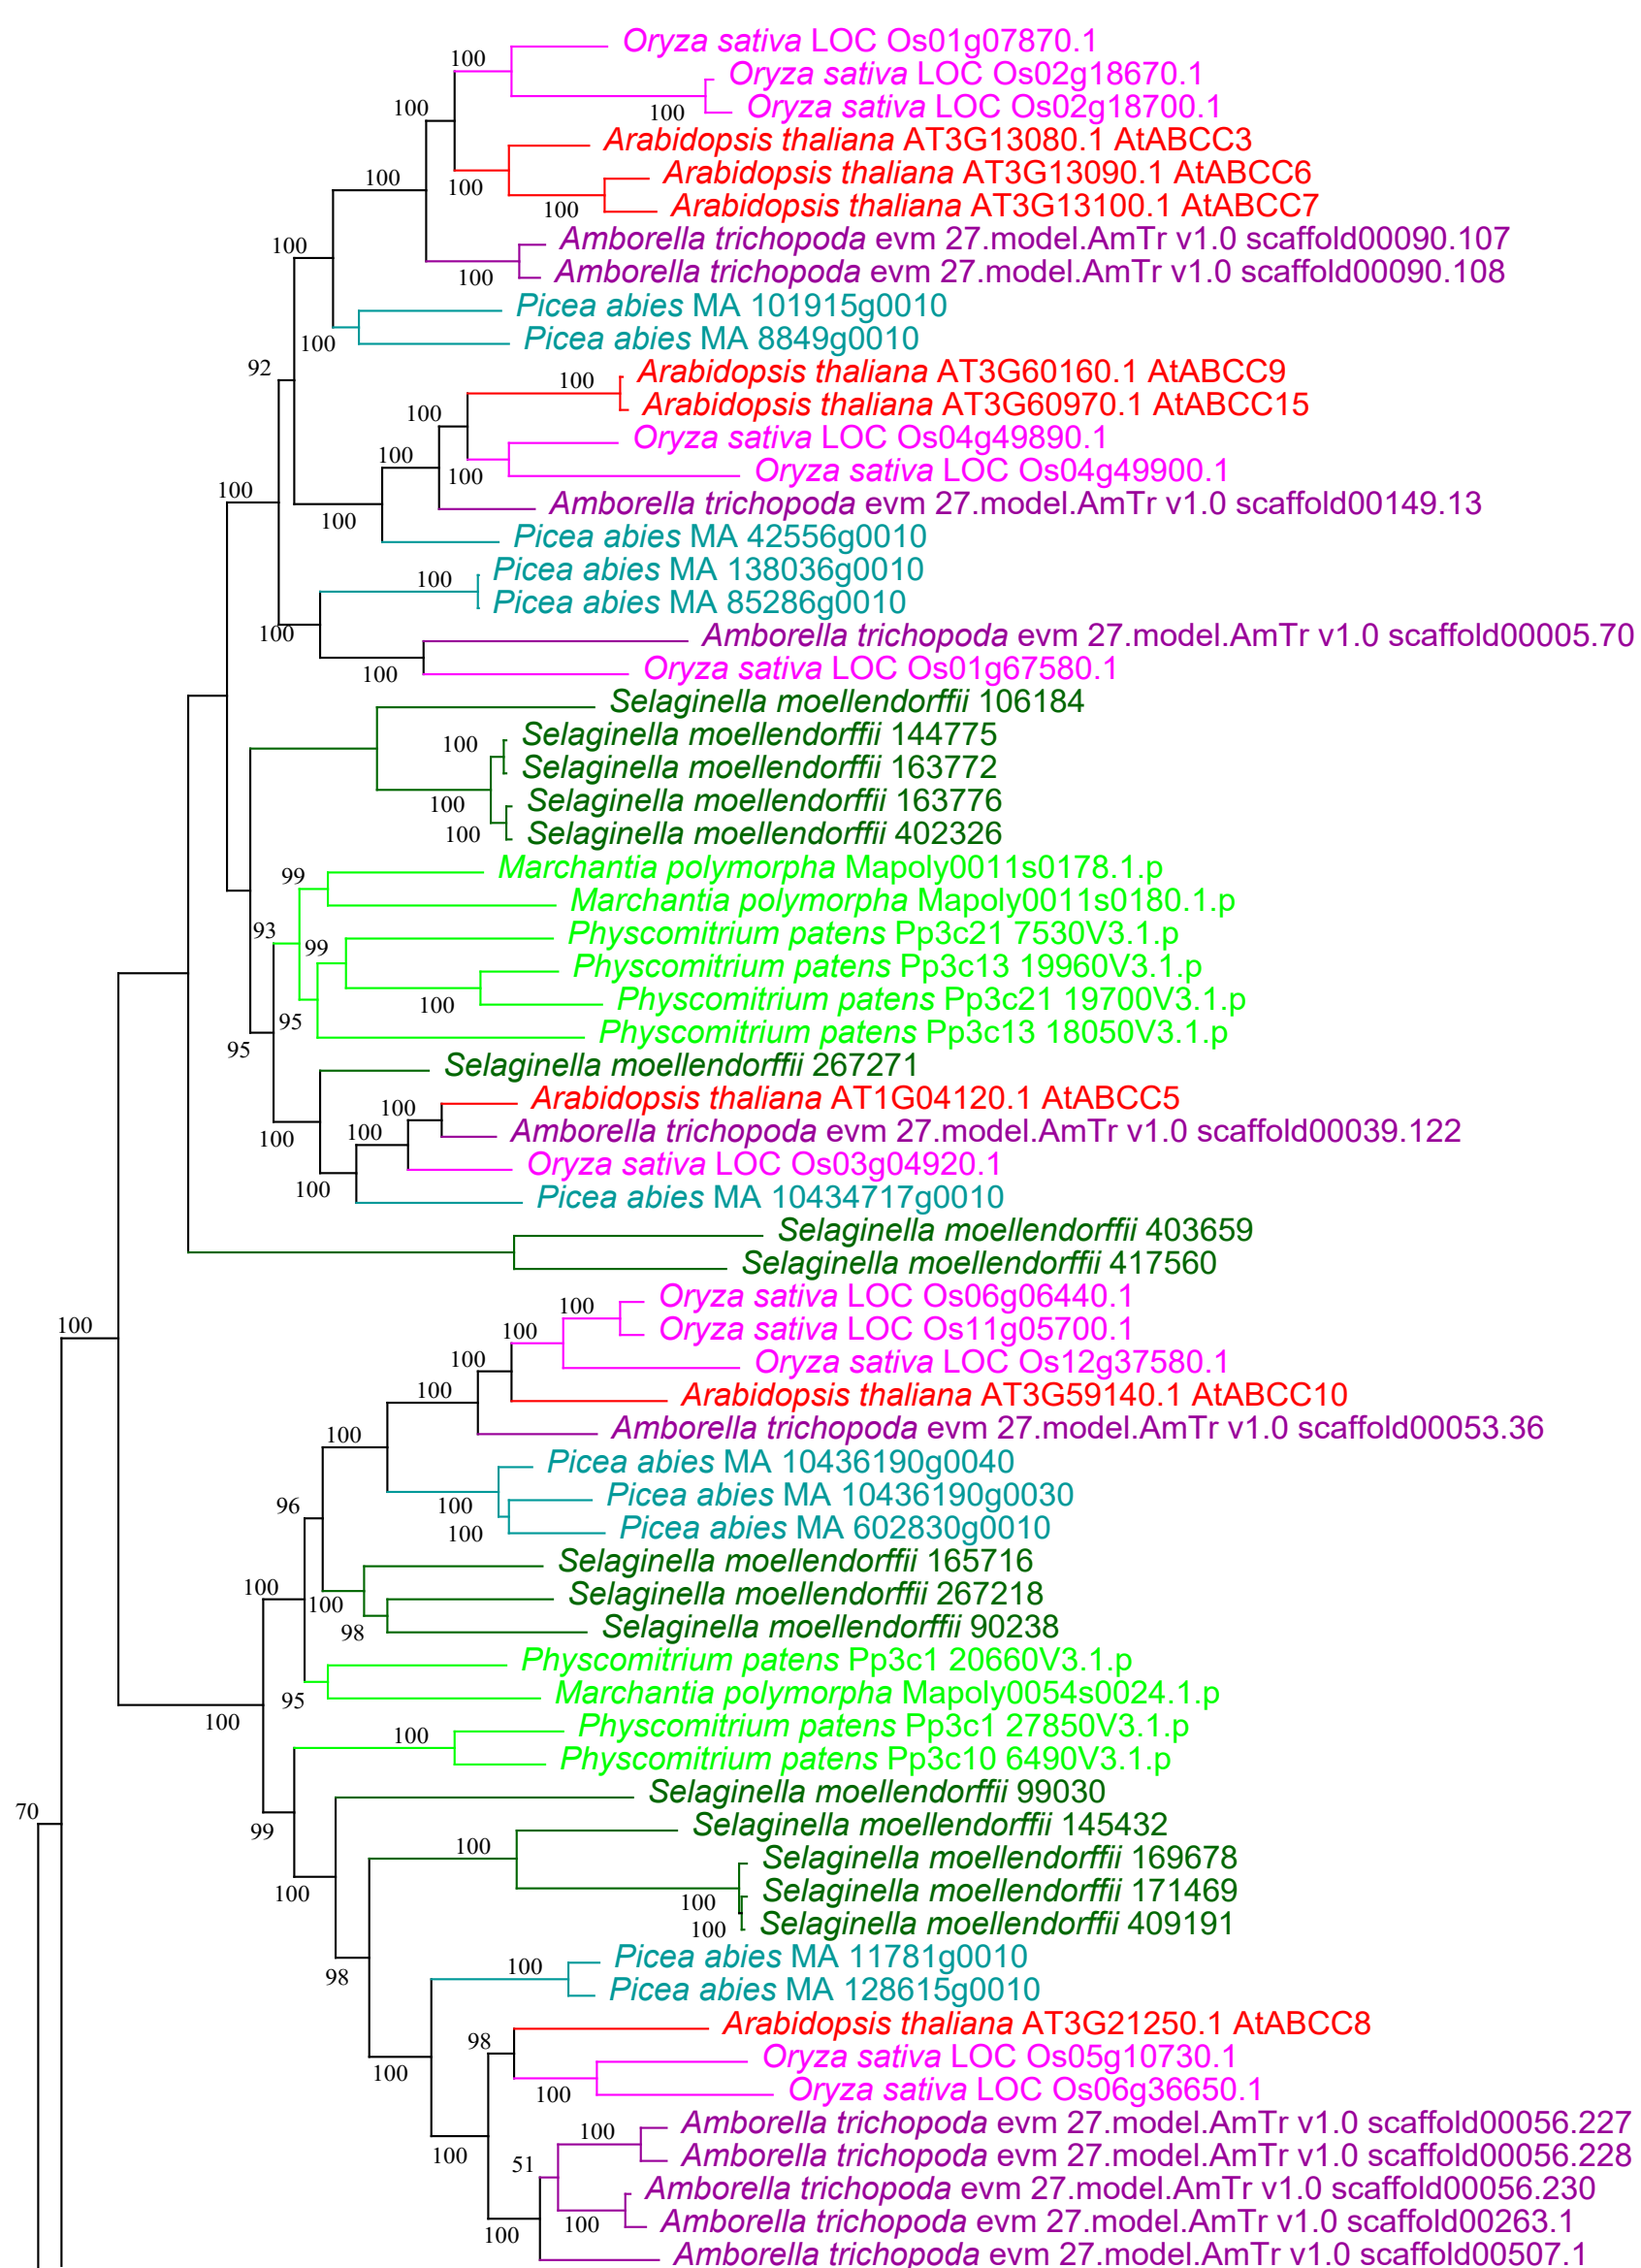

G1

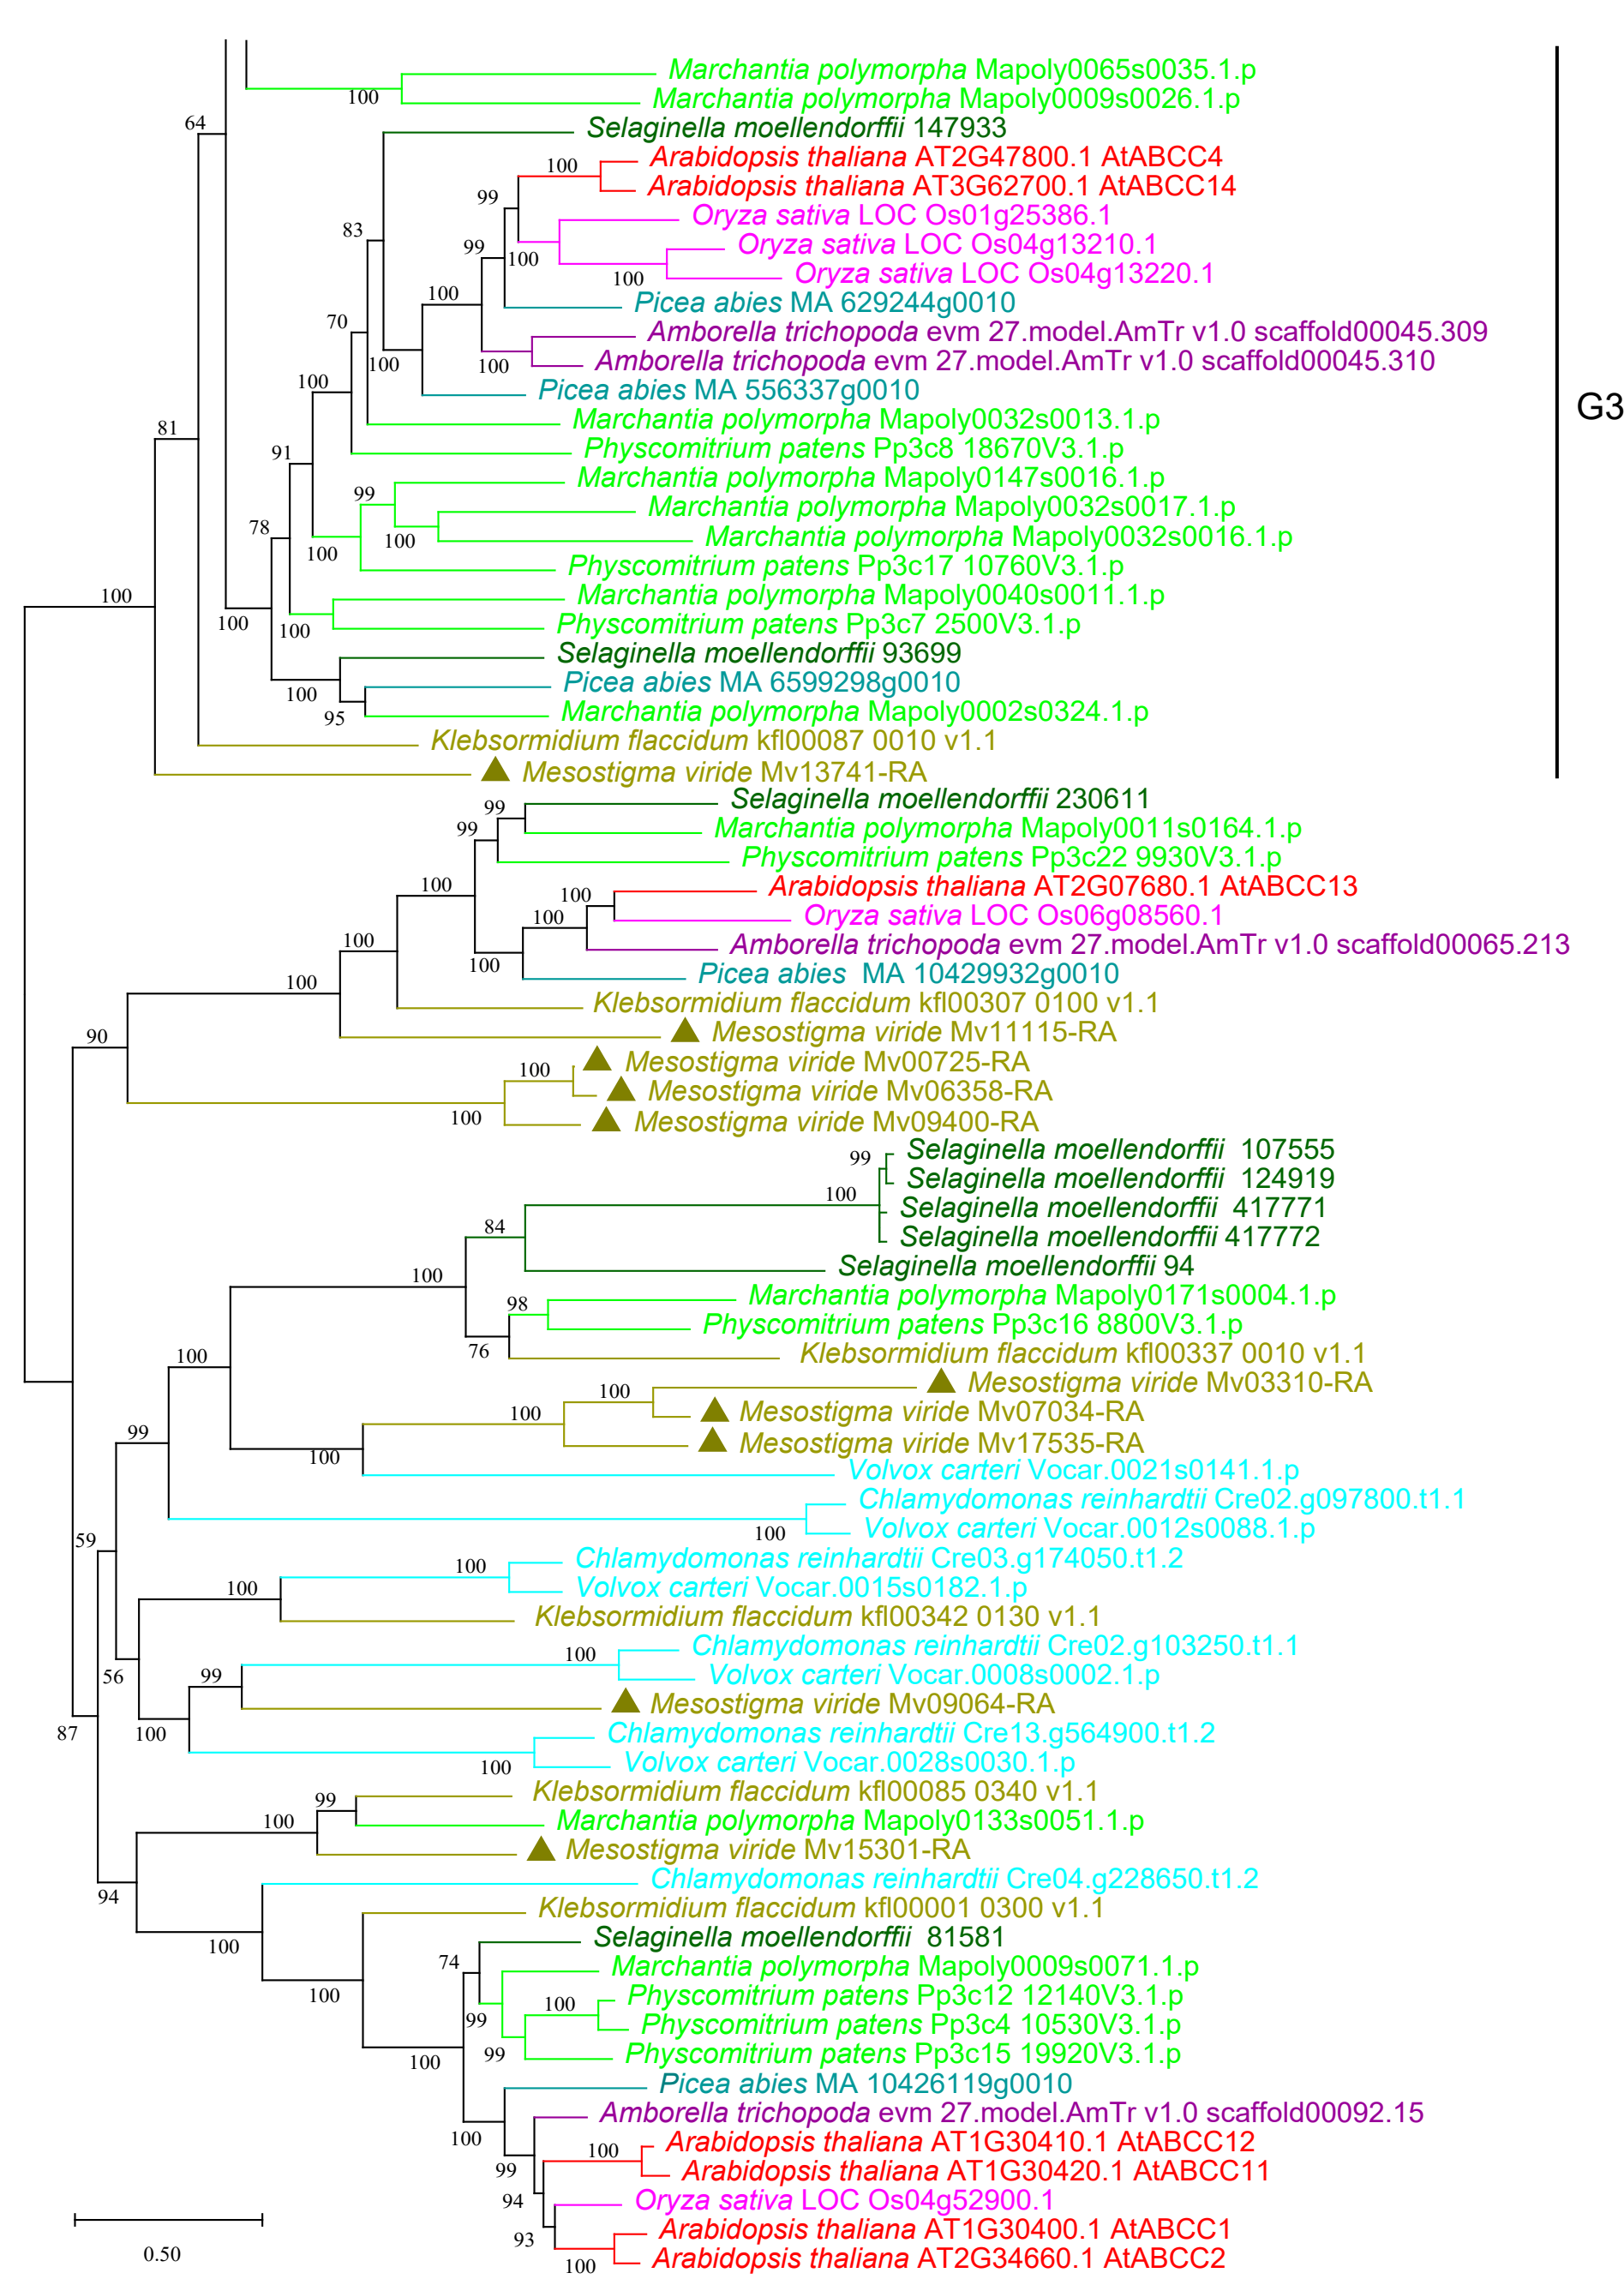

G3

G4

G2

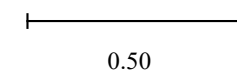

Supplement: s1 [file s1]

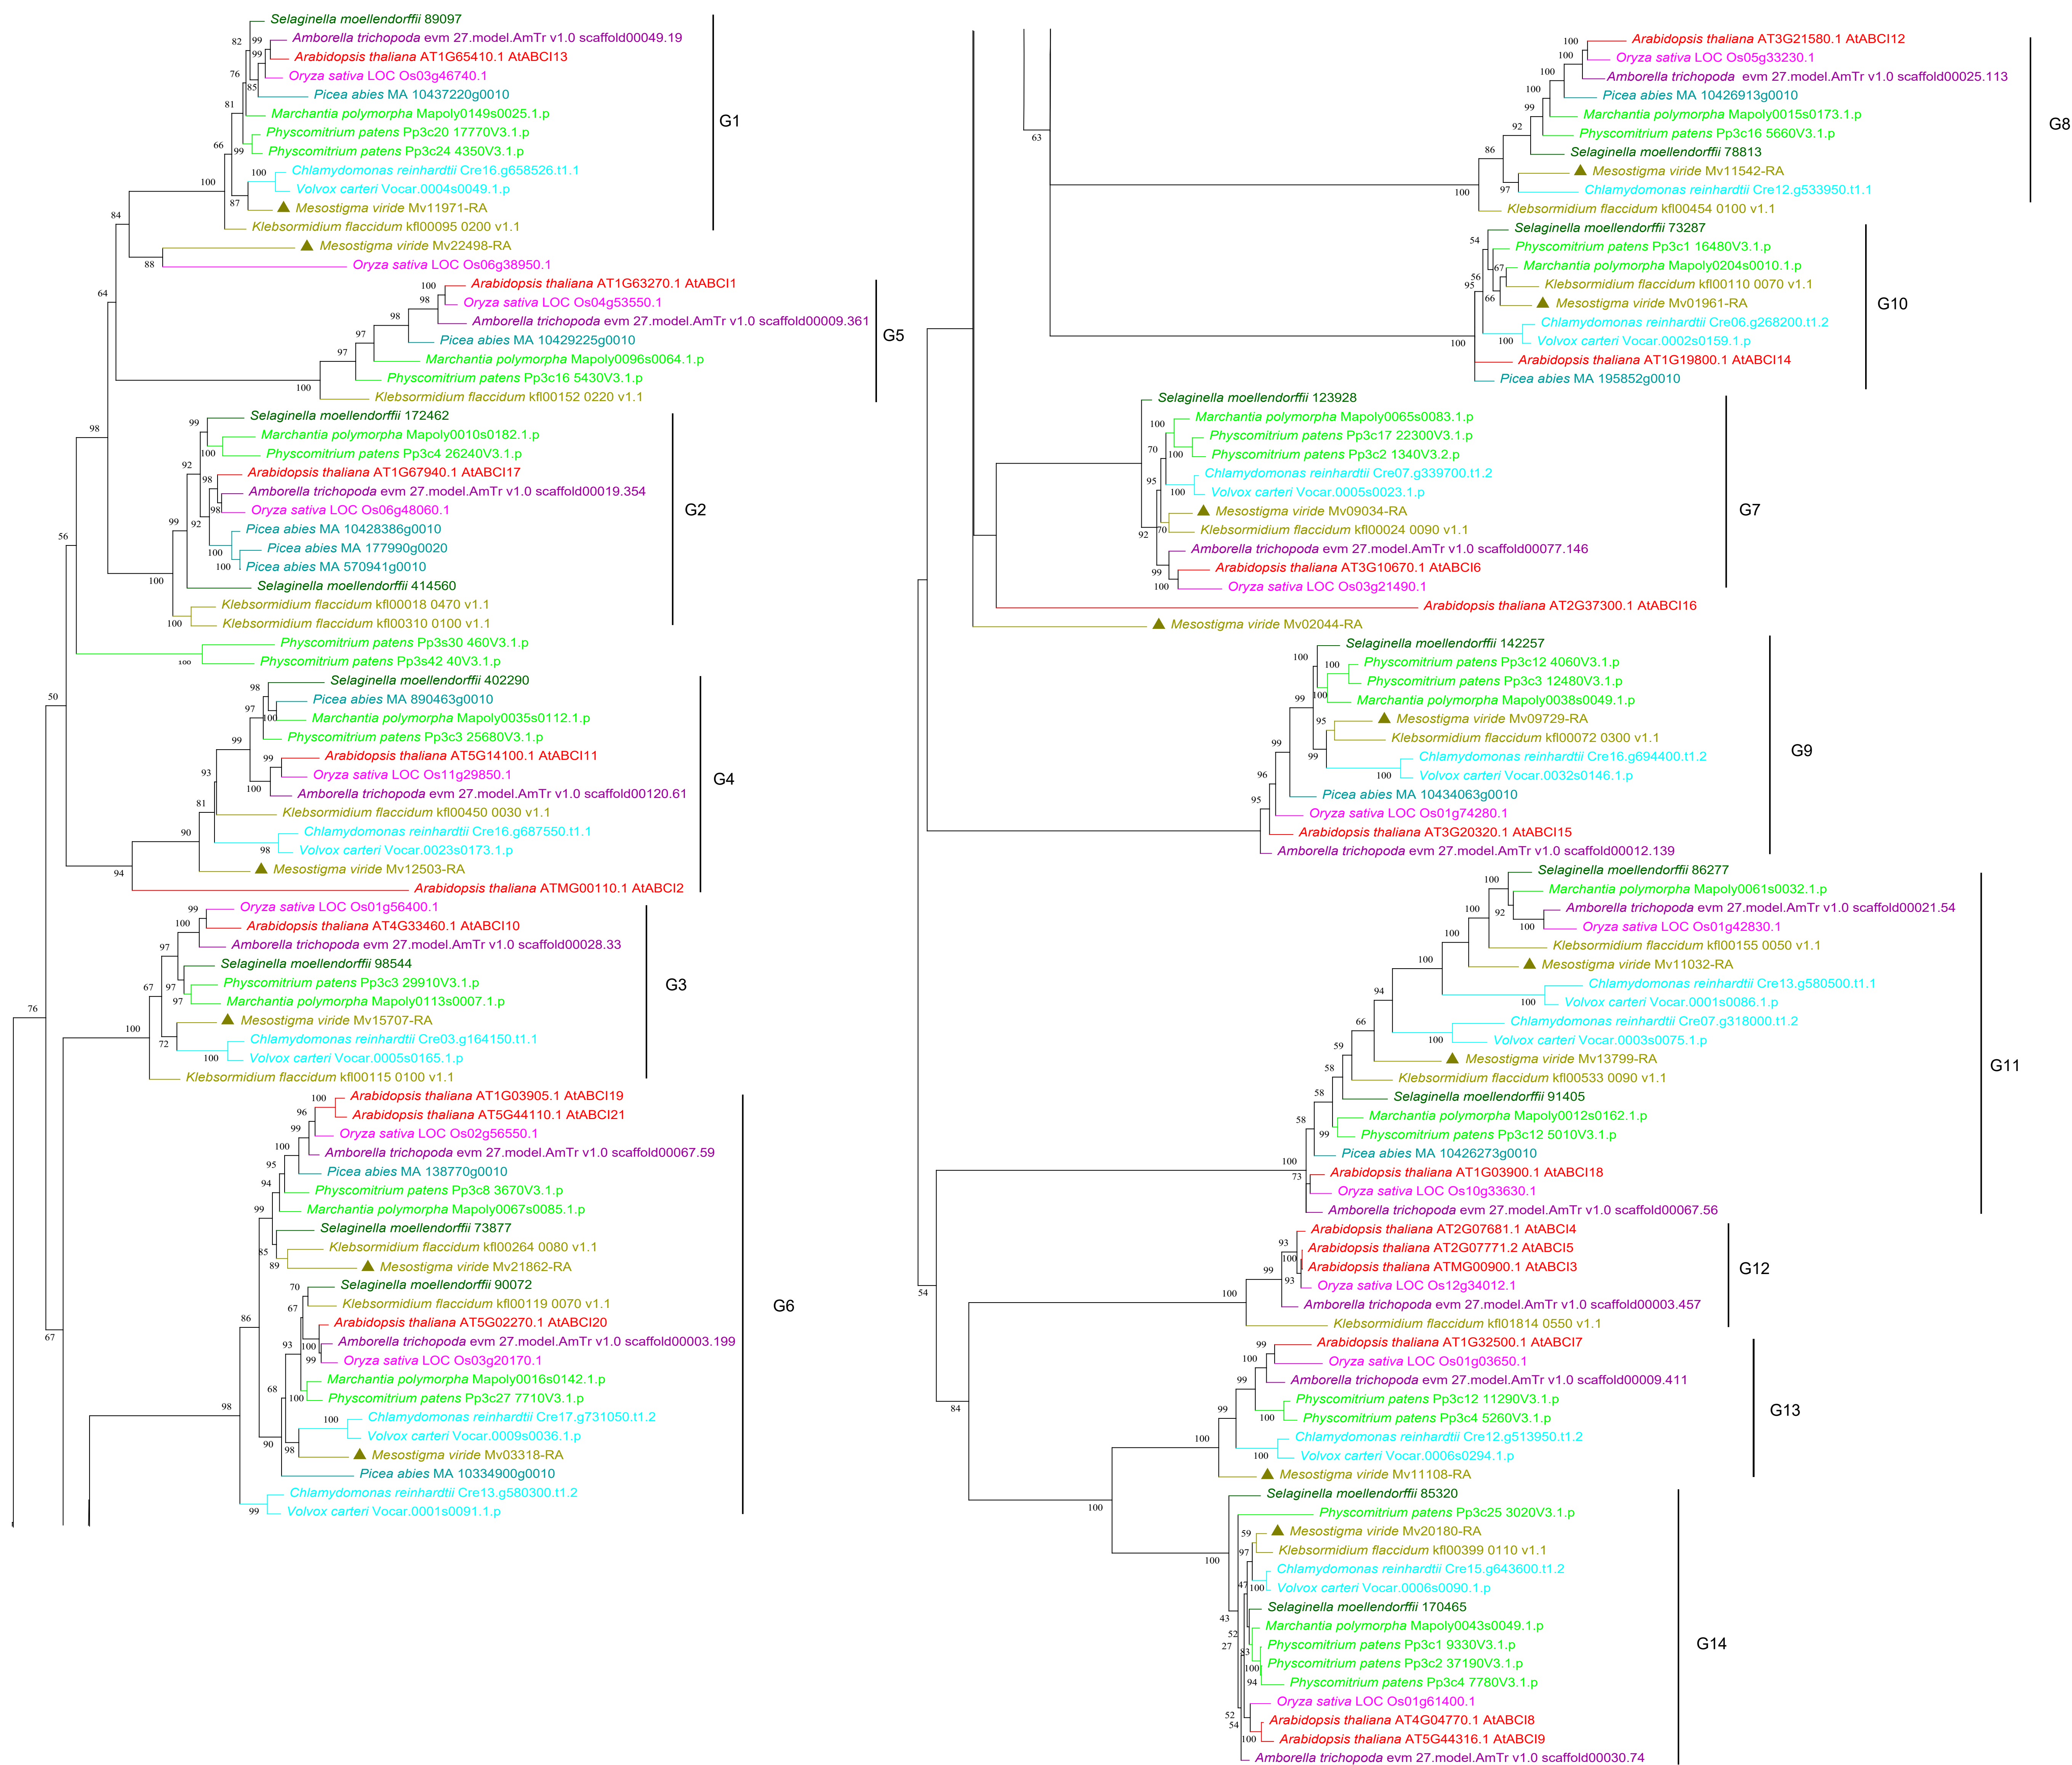

Supplement: s1 [file s1]

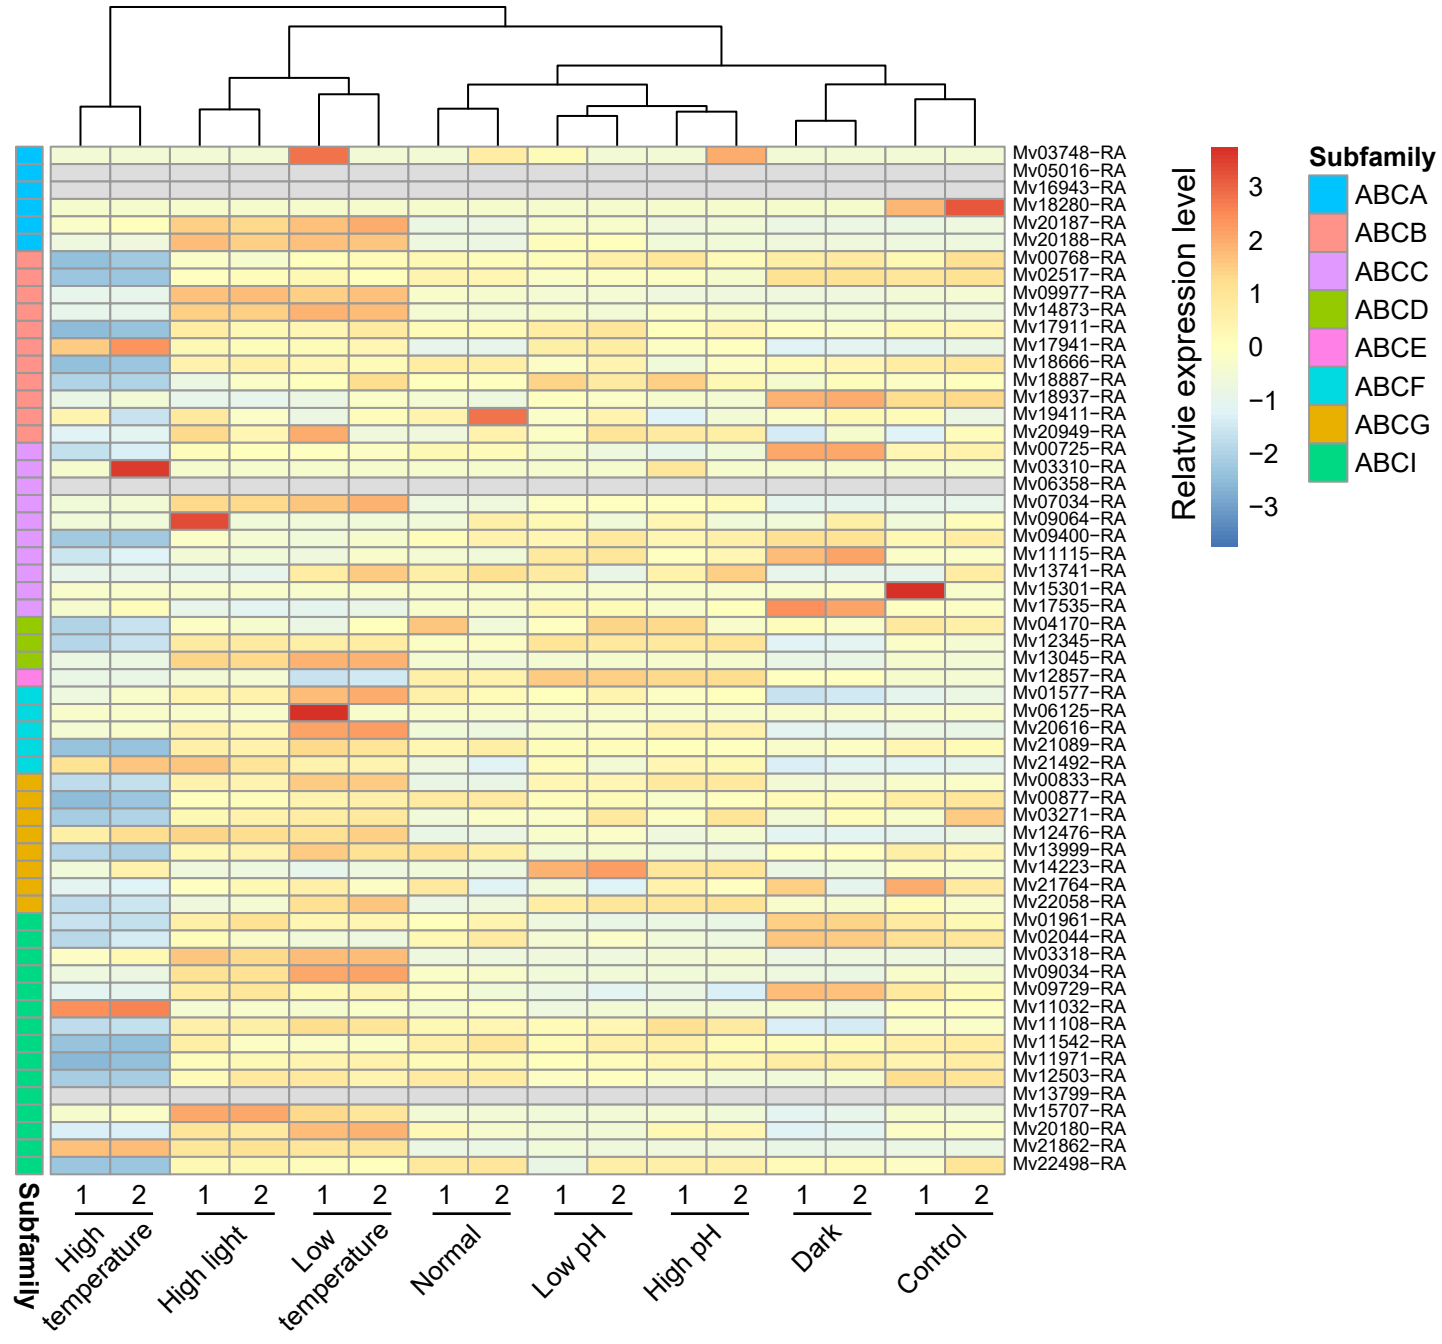

Supplement: s1 [file s1]

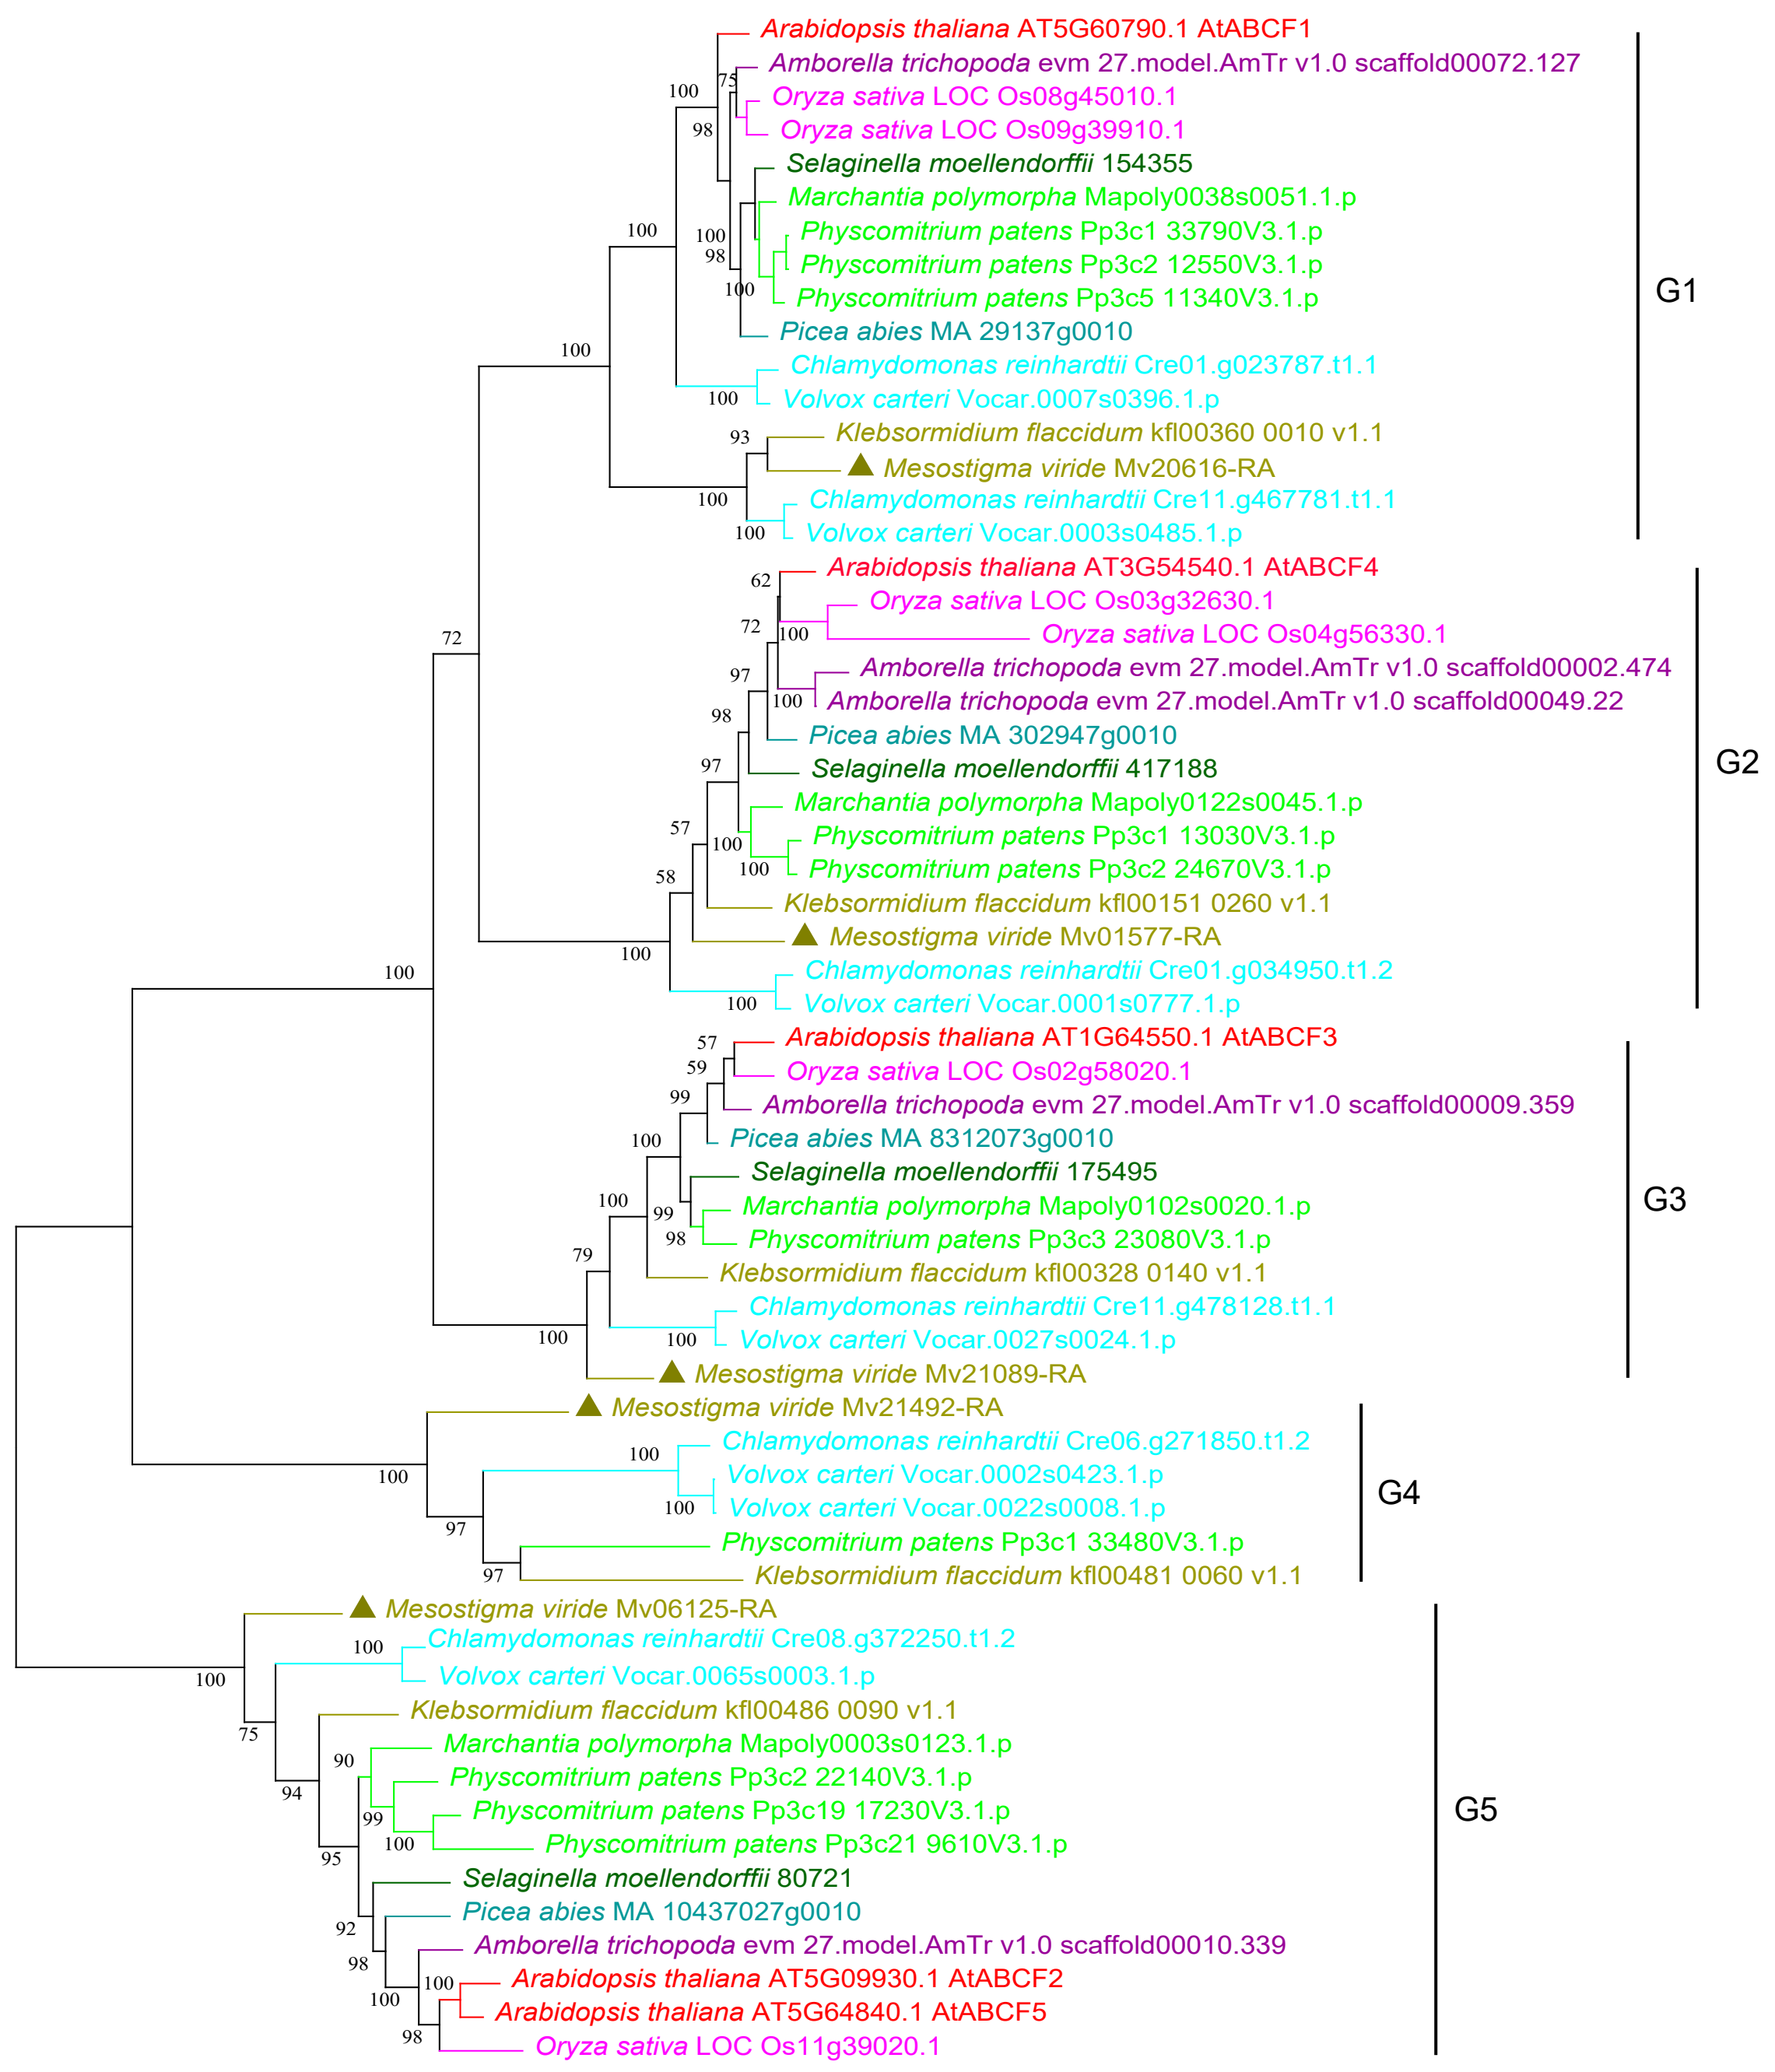

1

Supplement: s1 [file s1]

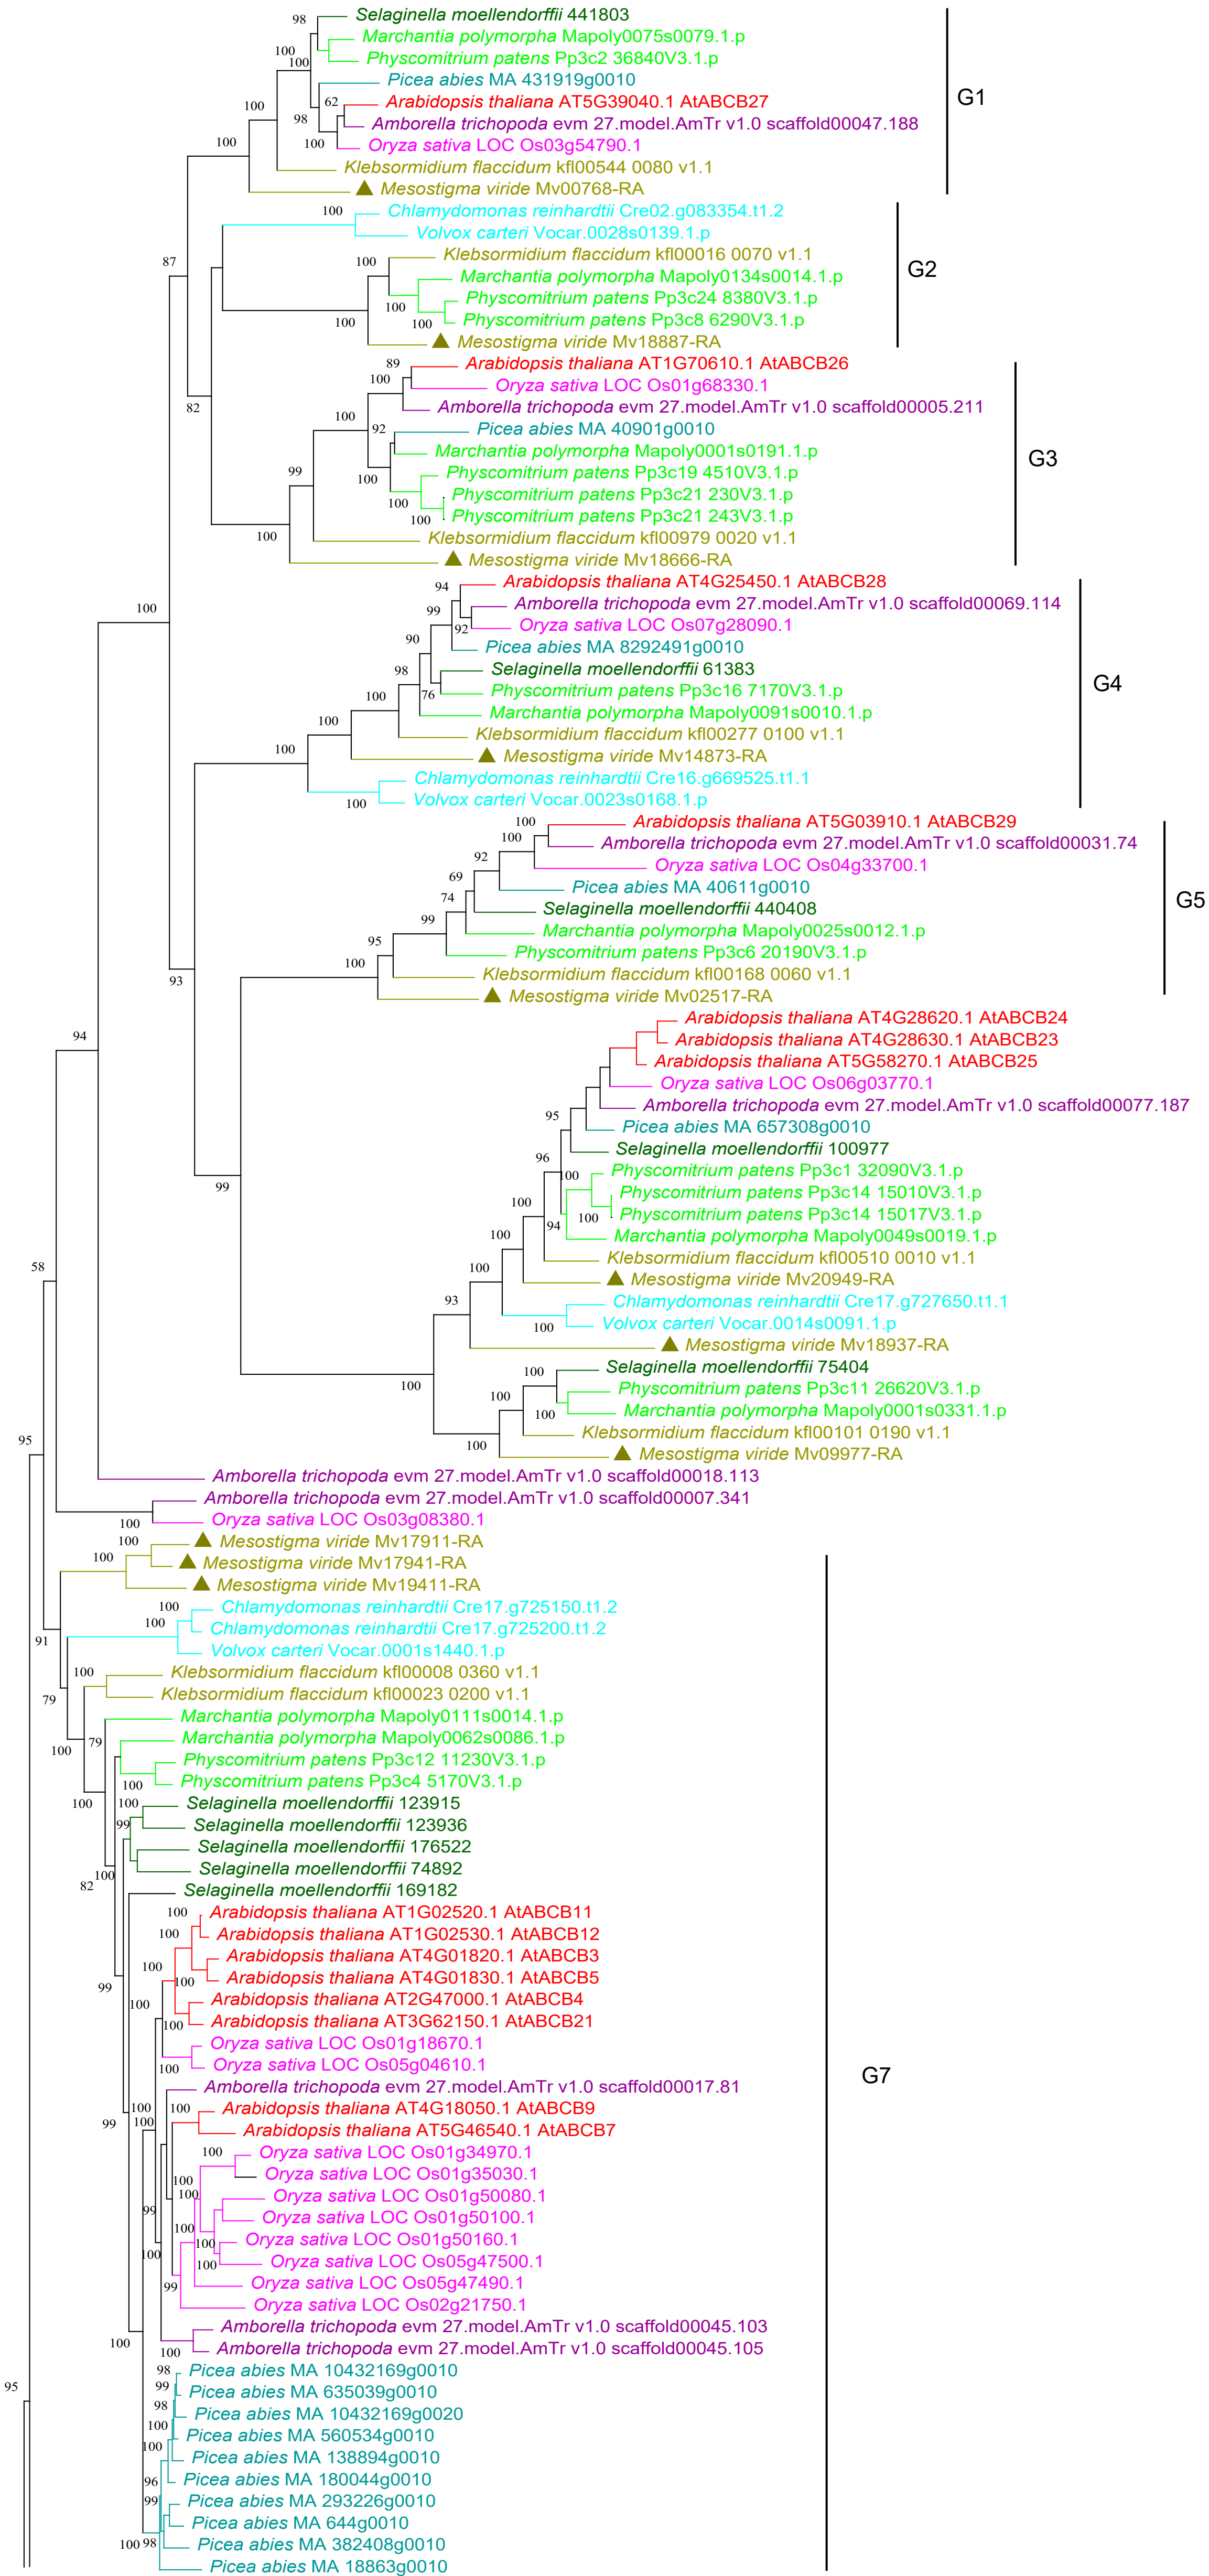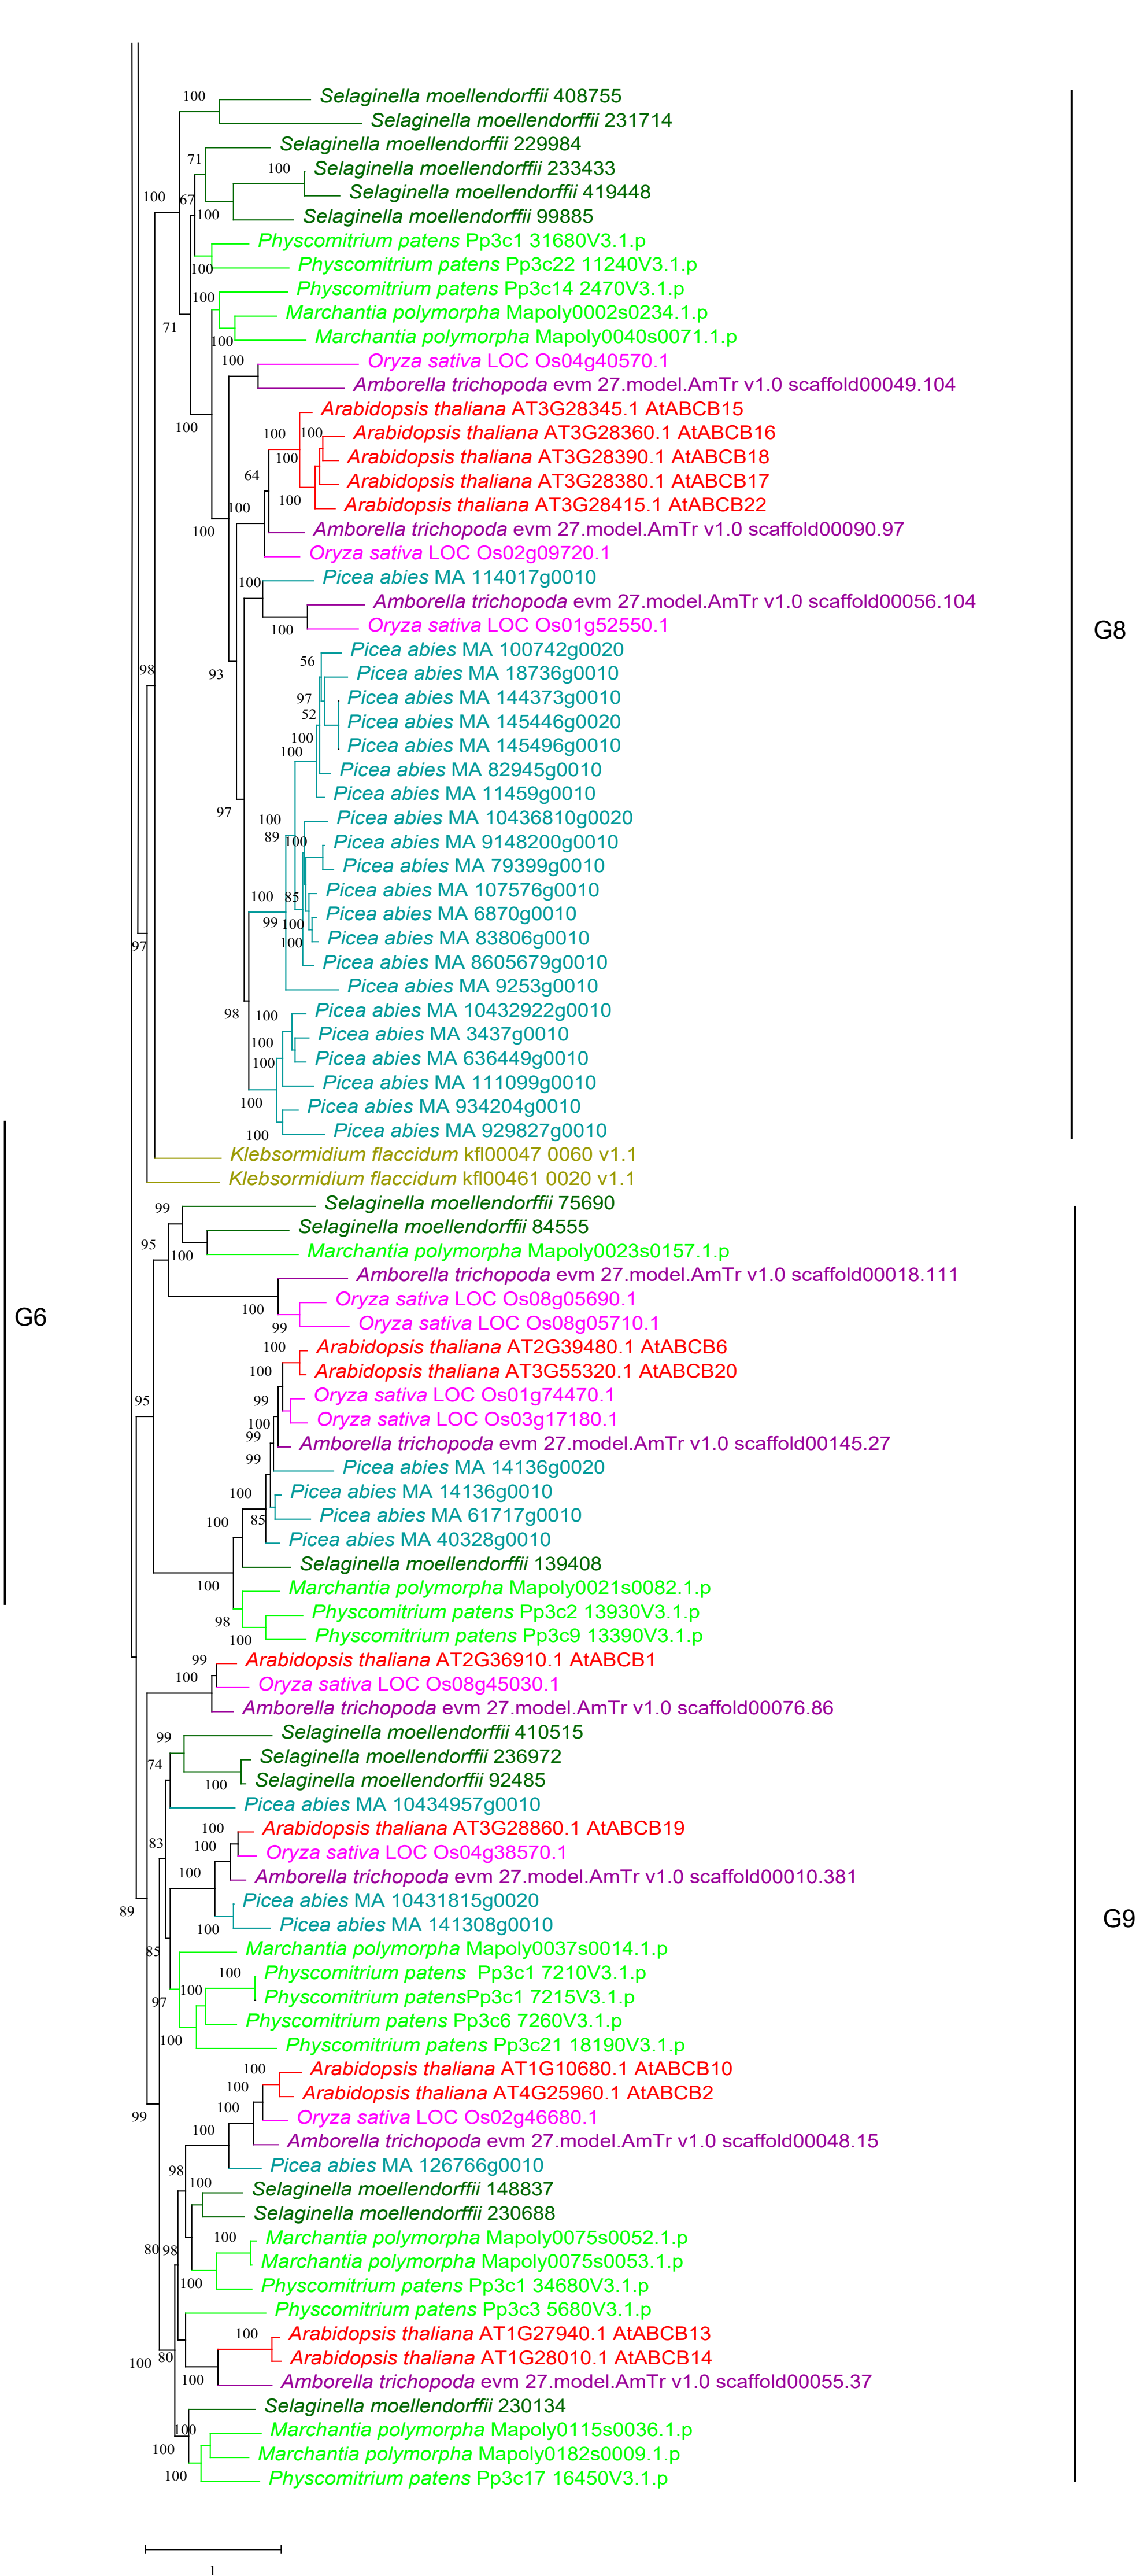

Supplement: s1 [file s1]

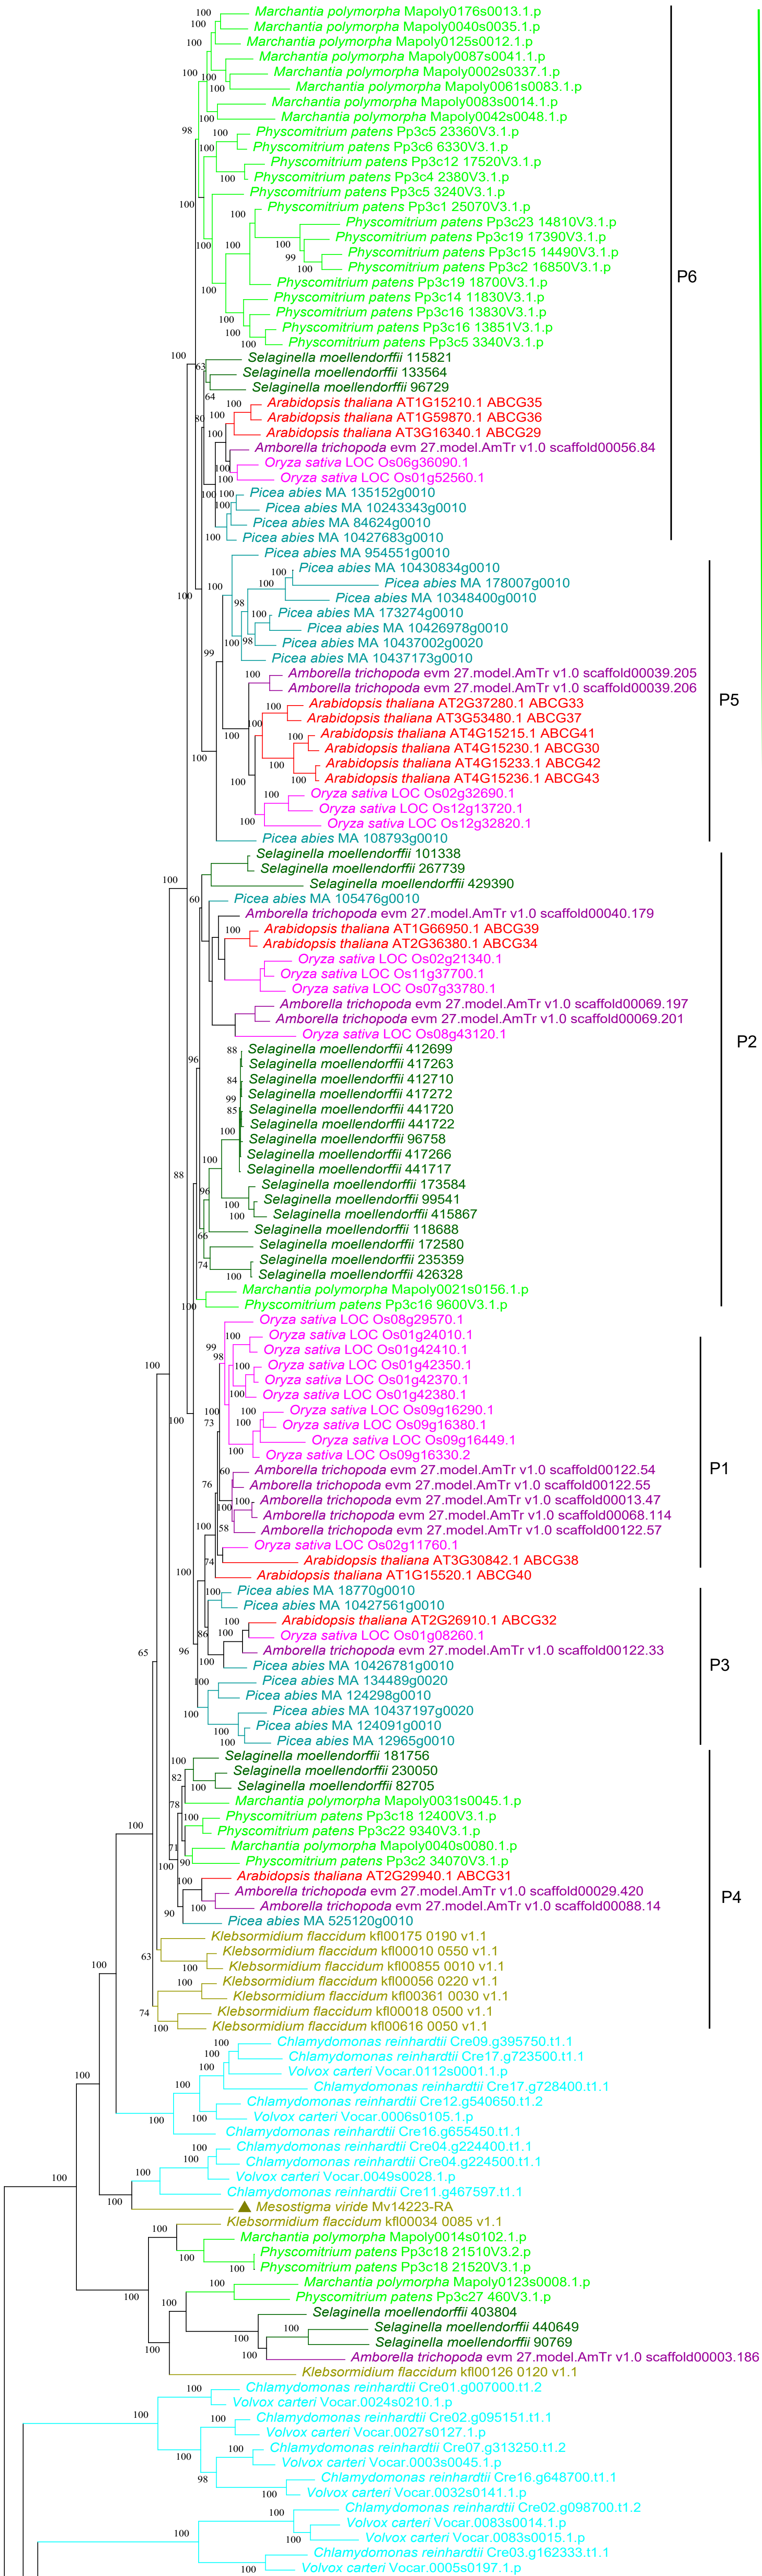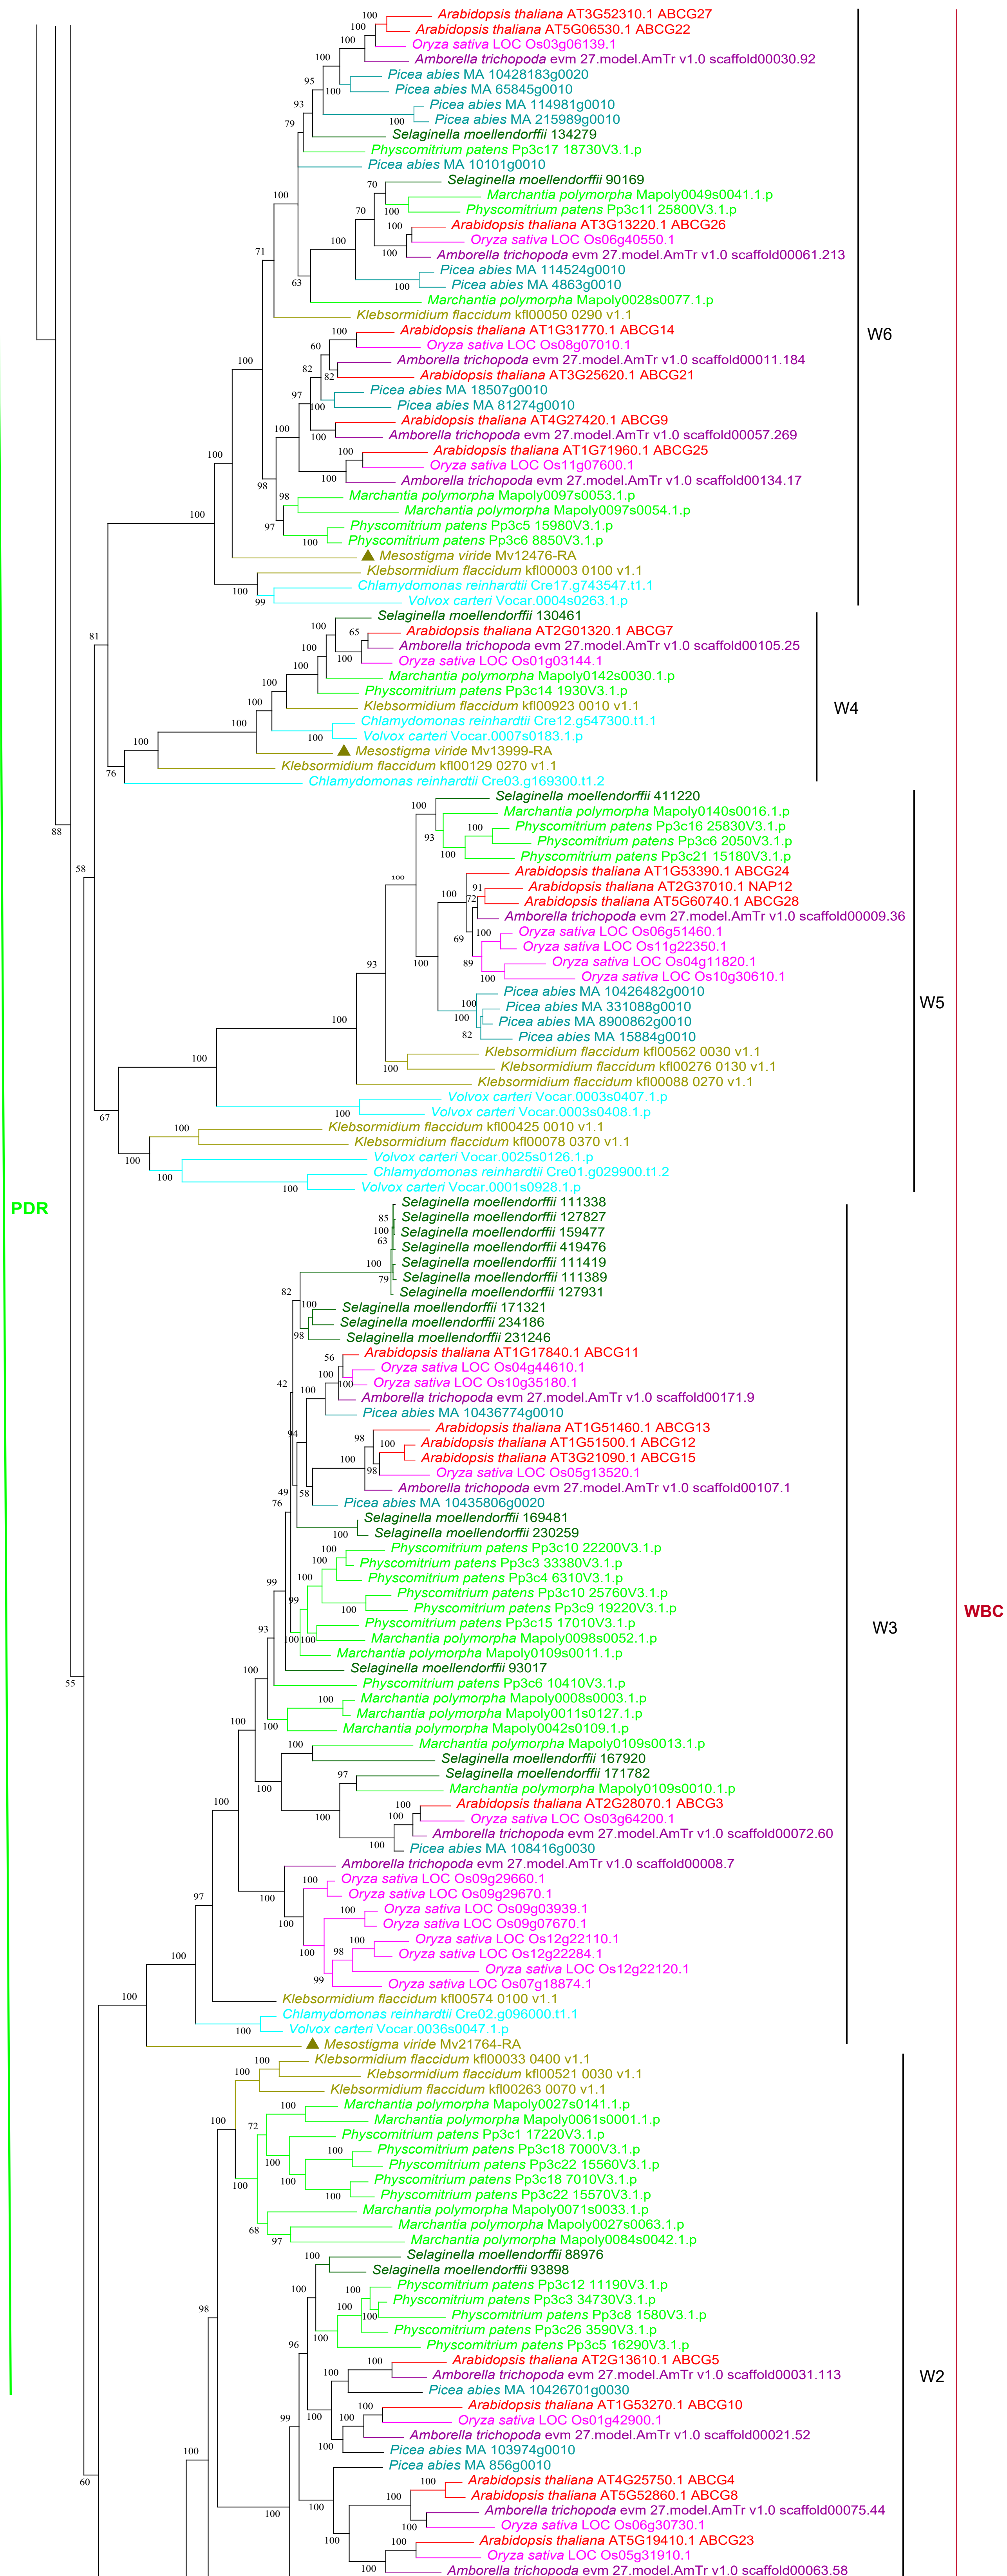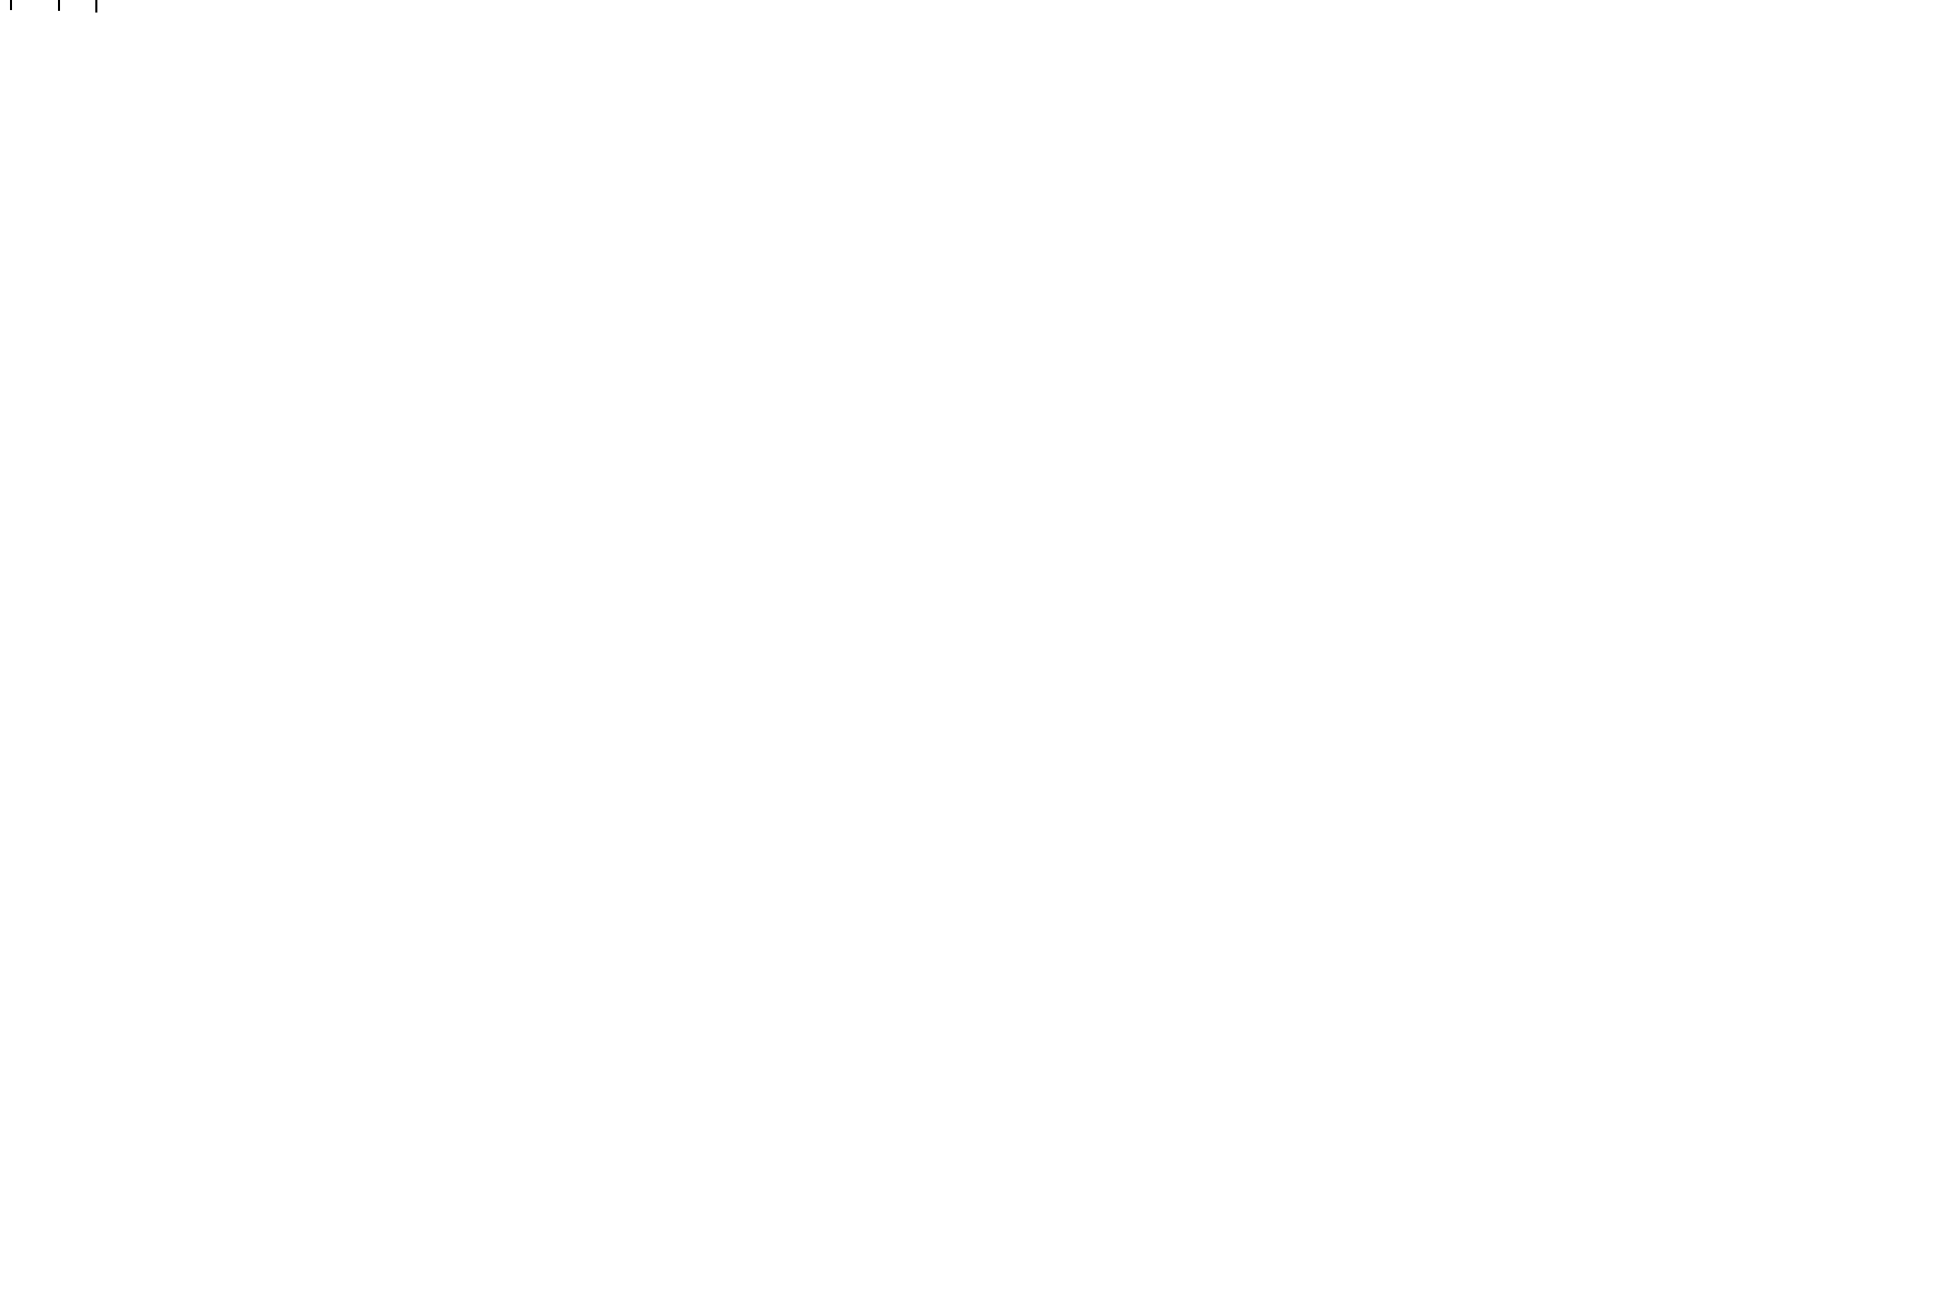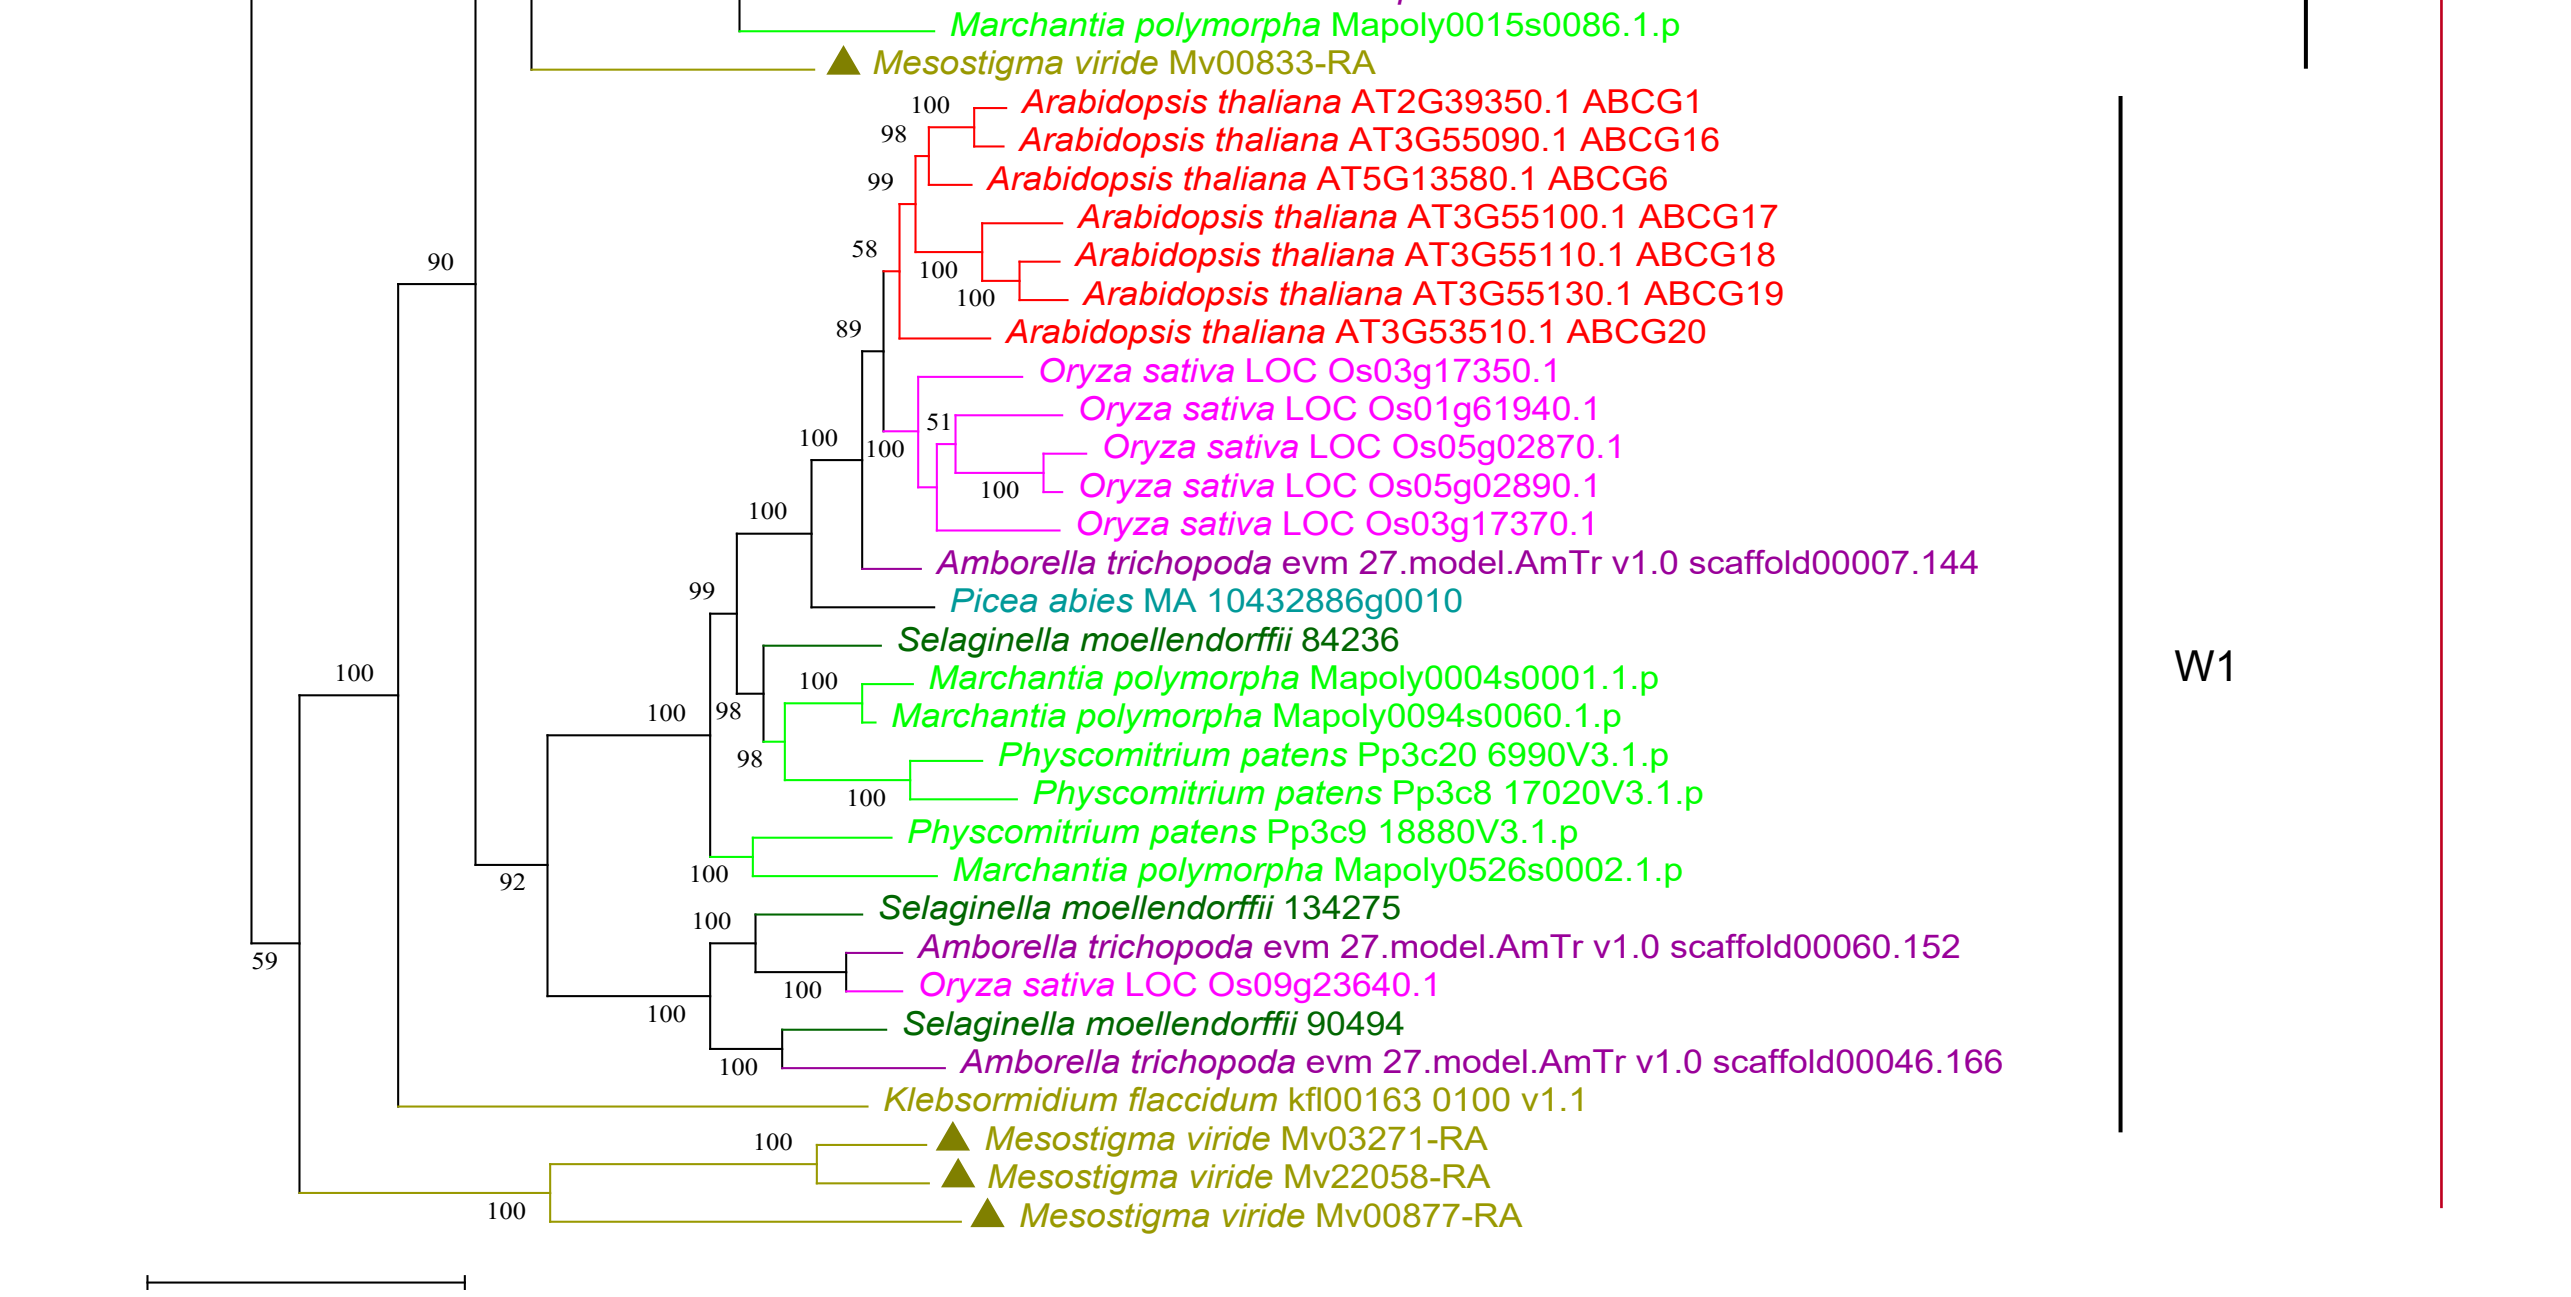

Supplement: s1 [file s1]

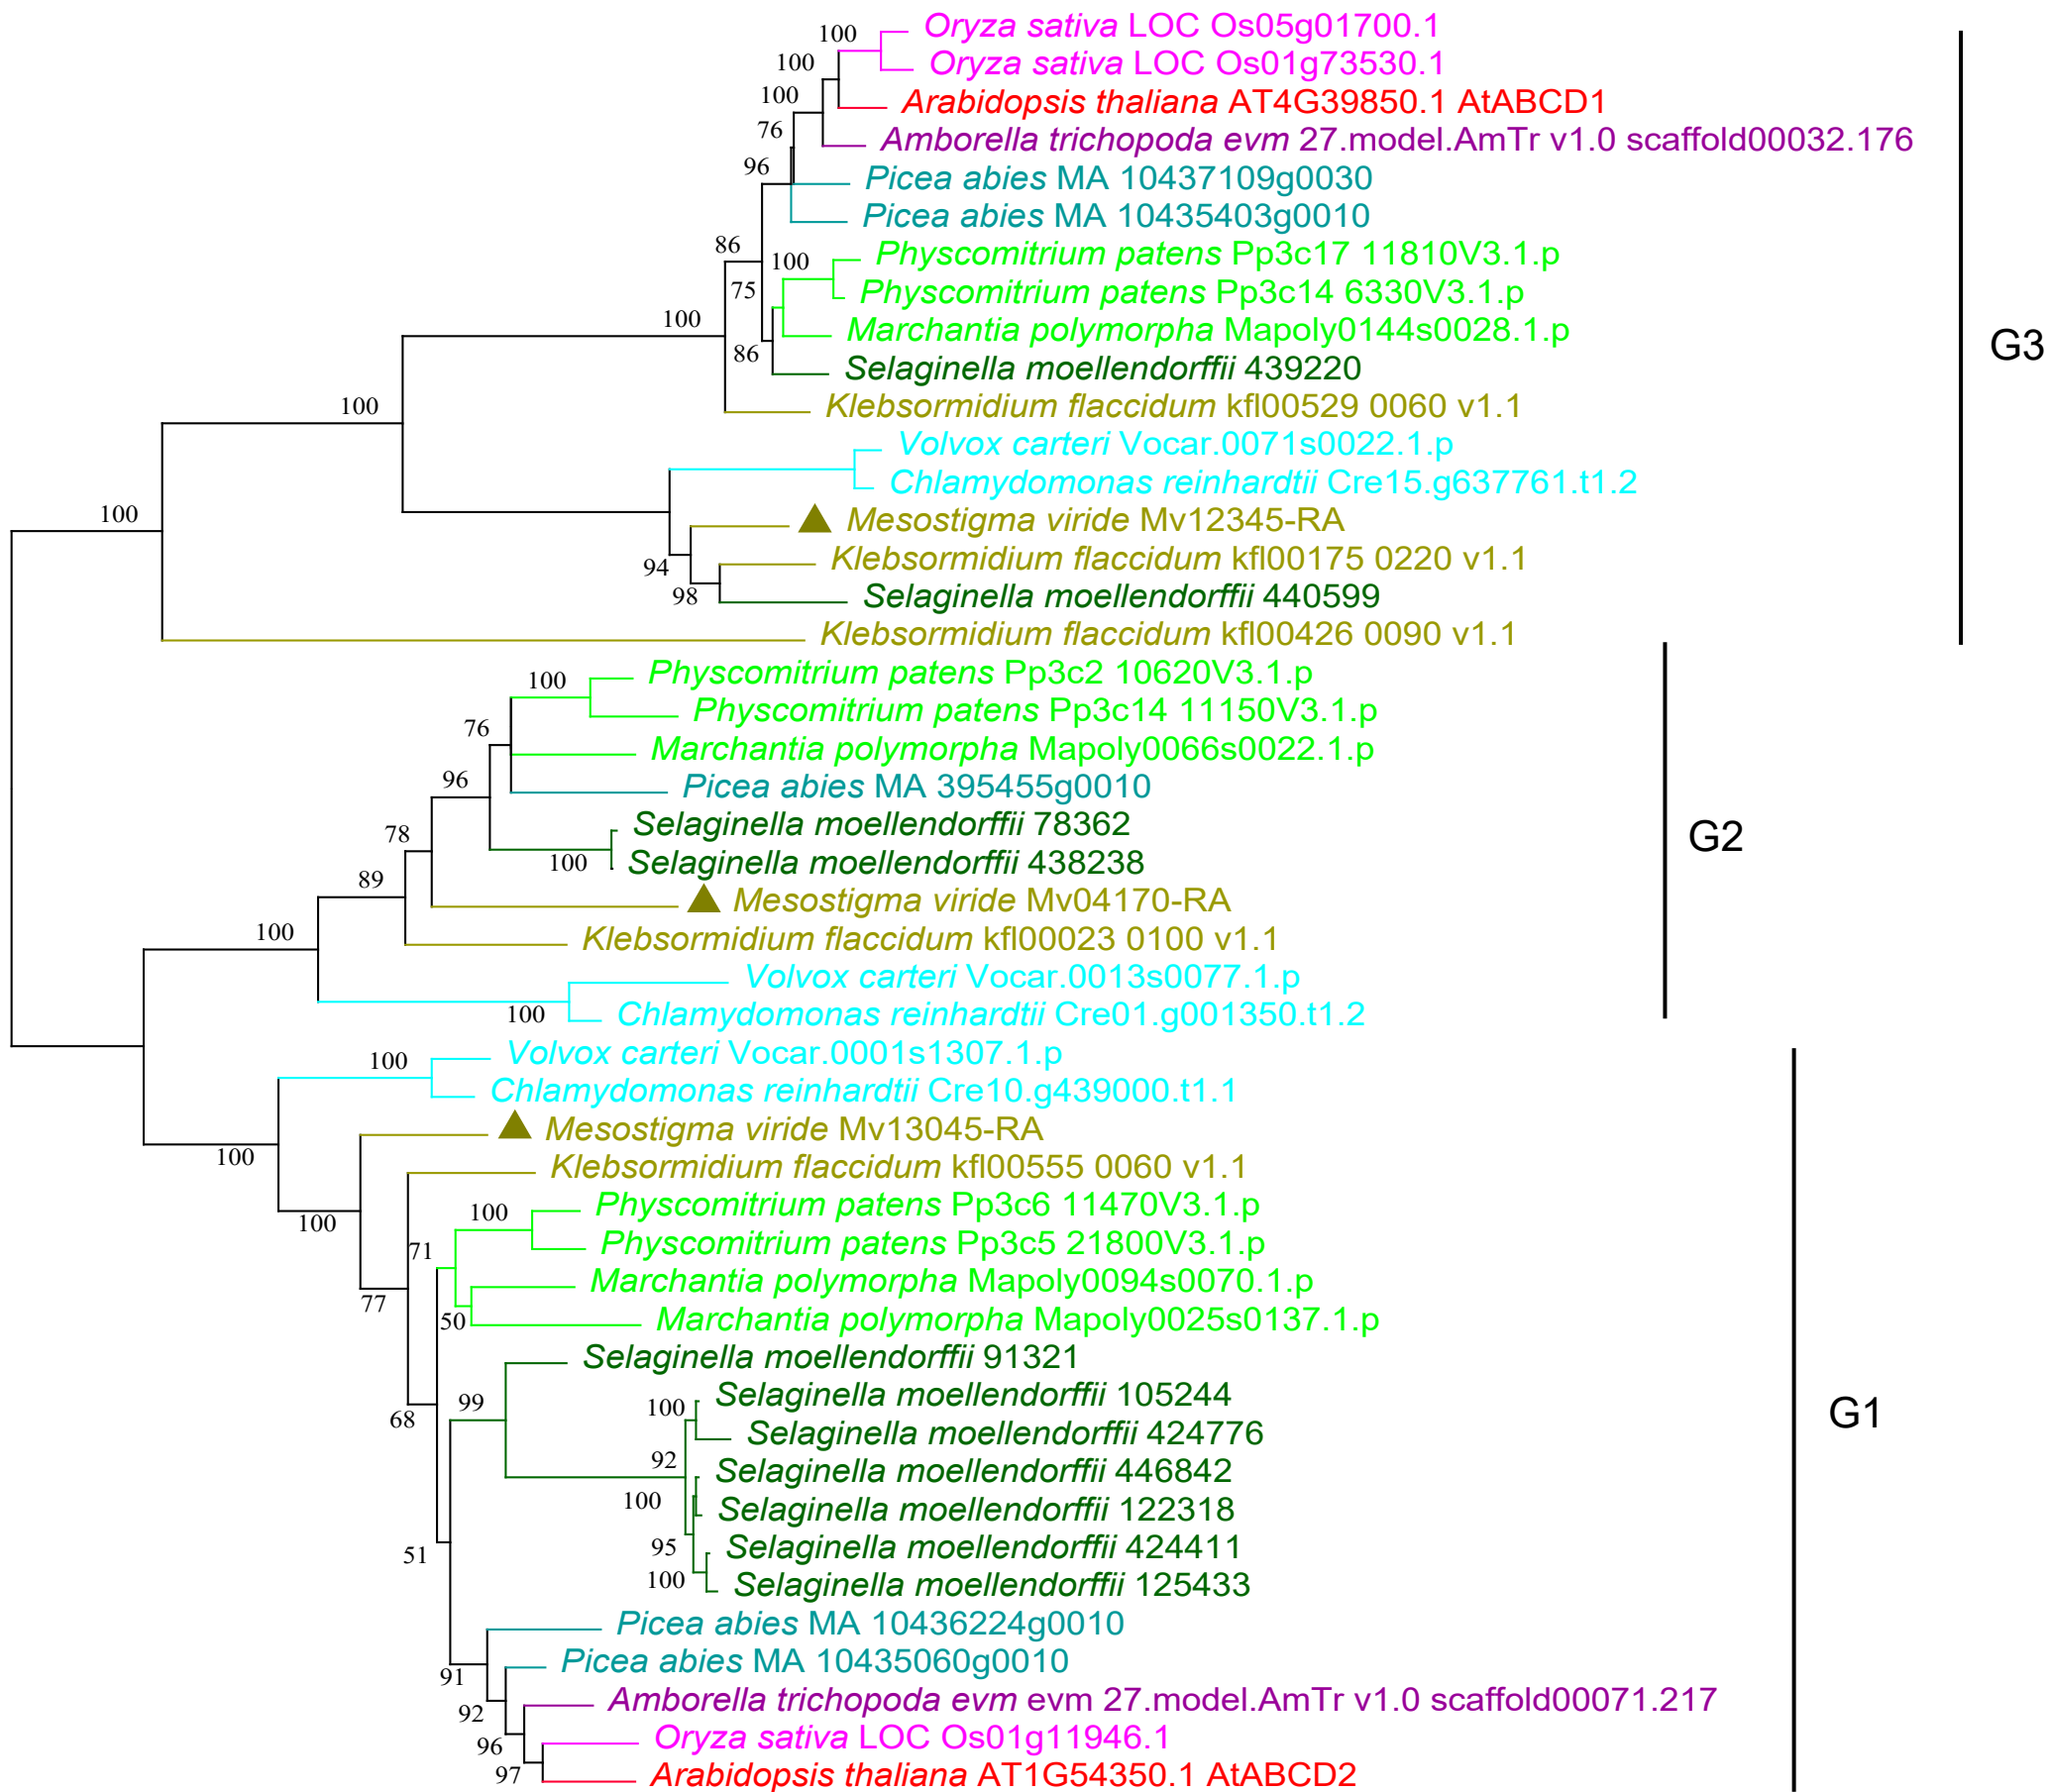

1

Supplement: s1 [file s1]
